1 **Title:**

2 The gait dynamics of the modern broiler chicken: A cautionary tale of selective  
3 breeding

4  
5 Heather Paxton\*, Monica A. Daley\*, Sandra A. Corr\*†, John R. Hutchinson\*

6  
7 Structure and Motion Laboratory\*

8 Department of Comparative Biomedical Sciences

9 The Royal Veterinary College

10 University of London

11 Hatfield, Hertfordshire, UK

12

13 Division of Surgery†

14 School of Veterinary Medicine and Science

15 University of Nottingham

16 Sutton Bonington, Leicestershire, UK

17

18 **Contact information:**

19 Heather Paxton; hpaxton@rvc.ac.uk

20 Phone +44 (0) 1707 666 456

21

22 **Summary:**

23 One of the most extraordinary results of selective breeding is the modern broiler  
24 chicken, whose phenotypic attributes reflect its genetic success. Unfortunately, leg  
25 health issues and poor walking ability are prevalent in the broiler population, with the  
26 exact aetiopathogenesis unknown. Here we present a biomechanical analysis of the  
27 gait dynamics of the modern broiler and its two pureline commercial broiler breeder  
28 lines (A and B) in order to clarify how changes in basic morphology are associated  
29 with the way these chickens walk. We collected force plate and kinematic data from  
30 25 chickens (market age), over a range of walking speeds, to quantify the 3D  
31 dynamics of the centre of mass (CoM) and determine how these birds modulate the  
32 force and mechanical work of locomotion. Common features of their gait include  
33 extremely slow walking speeds, a wide base of support and large lateral motions of  
34 the CoM, which primarily reflect changes to cope with their apparent instability and

35 large body mass. These features allowed the chickens to keep their peak vertical  
36 forces low, but resulted in high mediolateral forces, which exceeded fore-aft forces.  
37 Gait differences directly related to morphological characteristics also exist. This was  
38 particularly evident in pureline B birds, which have a more crouched limb posture.  
39 Mechanical costs of transport were still similar across all lines and were not  
40 exceptional when compared to more wild-type ground-running birds. Broiler  
41 chickens seem to have an awkward gait, but some aspects of their dynamics show  
42 rather surprising similarities to other avian bipeds.

43

44 **Key words:**

45 broiler chicken, gait, locomotion, leg weakness, morphology, selective breeding

46

47 **Introduction:**

48 Although Darwin detailed how organisms evolve through natural selection (Darwin,  
49 1859), he built his case partly on the knowledge that humans have used an analogous  
50 principle in the domestication of plants and animals for thousands of years. This has  
51 allowed livestock breeders to fully exploit desired phenotypic traits, resulting in  
52 dramatic and rapid changes in appearance and behaviour from their wild ancestors. A  
53 prime example of these dramatic changes can be seen in the modern broiler (a type of  
54 chicken raised specifically for meat), which has extremely rapid growth rates (18  
55 standard deviations from its original rate across ~50 years of breeding; Whitehead et  
56 al., 2003), a significantly larger pectoral muscle mass and increased meat yield  
57 (Barton, 1994; Lilburn 1994; Webster 1995; Nicholson, 1998; Corr et al., 2003a;  
58 Havenstein et al., 2003a, 2003b). However, this seeming success in the production  
59 efficiency of the modern broiler has come with unwanted consequences. In particular,  
60 musculoskeletal abnormalities and poor walking ability (commonly referred to  
61 together as ‘leg weakness’) are the most prevalent causes of culling and late mortality  
62 in the modern broiler (Pattison, 1992; Knowles et al., 2008).

63

64 Typically, leg weakness is characterised using a subjective gait scoring method, which  
65 assesses the walking ability of birds based on an abstract ideal of a ‘normal’ gait.  
66 Normal birds are considered more agile than those with an ‘abnormal’ gait, and in the  
67 worst cases, extremely abnormal birds may be incapable of sustained walking (Kestin  
68 et al., 1992). These gait scoring methods have been used extensively within the

69 scientific community to understand the health and welfare implications in poultry (e.g.  
70 McGeown et al., 1999; Danbury et al., 2000; Weeks et al., 2000; Sandiland et al.,  
71 2011), but the actual relationship between this impaired walking ability and specific  
72 leg problems remains unclear (see review; Bradshaw et al., 2002). The difficulties are  
73 apparent; potential links of gait mechanics to pathology and walking ability remain  
74 merely inferential, the chance of detecting a subtle gait change correlated to pathology  
75 appears low and hence requires large sample sizes (Sandiland et al., 2011), and part of  
76 the difficulty in associating gait changes with certain pathologies is that chickens  
77 often have multiple pathologies. The way a chicken walks can therefore be a product  
78 of the underlying pathology and/ or stresses, plus the bird's attempt to compensate for  
79 it.

80

81 Our first aim is therefore to quantify the locomotor dynamics of the modern broiler as  
82 an exploratory analysis of how selection has actually altered the way these birds walk  
83 and perhaps contributed to lameness. Since few studies have actually detailed  
84 objective measures of the modern broiler's gait (Reiter and Bessei, 1997; Corr et al.,  
85 1998; Corr et al., 2003b; Corr et al., 2007), here we establish the 'normal' gait  
86 characteristics of the modern broiler. We do this as an essential first step toward the  
87 longer-term goal of quantitatively characterizing, identifying and understanding  
88 abnormal gaits in different lineages of wild and domestic poultry, including broilers.  
89 We also clarify possible misconceptions associated with what may have partly  
90 evolved to be an awkward gait for effective locomotion versus the individual  
91 perception of a 'good' versus 'bad' gait or "leg weakness" in broilers. This is  
92 important to examine, because future considerations for the welfare of the modern  
93 broiler are likely to be laid heavily on visual aspects of their gait.

94

95 Ironically, broiler chickens, like other galliform birds, may be considered as specialist  
96 walkers (based on their dominant locomotor mode; Tickle et al., 2007; Nudds et al.,  
97 2010). Yet their exaggerated lateral motions (Corr et al., 2003b) suggest that they may  
98 share more in common with other waddling, more aquatic species such as penguins,  
99 geese or ducks (Griffin and Kram, 2000; Abourachid, 2001; Usherwood, 2008; Nudds  
100 et al., 2010). Such waddling birds are often described as 'awkward' or 'ungainly'  
101 walkers, yet the mechanics of waddling birds still conform with the classical  
102 pendulum model of walking bipeds, associated with the conservation of mechanical

103 energy (Cavagna, 1975; Cavagna et al., 1976, 1977). As much as 70% of the external  
104 work required to lift and accelerate the centre of mass can be recovered due to this  
105 energy saving mechanism (Cavagna et al., 1977; but see Donelan et al., 2002). The  
106 second aim of our study quantifies the 3D dynamics of the centre of mass (CoM) in  
107 order to determine how broiler chickens modulate the force and mechanical energy of  
108 locomotion. Altered behavioural patterns and reduced activity levels have been  
109 reported in these birds (Weeks et al., 1994; Estevez et al., 1997; Bizeray et al., 2000;  
110 Weeks et al., 2000), which are thought to be attributable to conformation-related gait  
111 alterations causing fatigue (Abourachid 1993; Corr et al., 2003b). We can test  
112 whether broilers require excessive work (using the metric of the mechanical cost of  
113 transport), requiring more mechanical energy from the limb muscles.

114  
115 Finally, we evaluate the effects of conformation on locomotor dynamics, by  
116 investigating two pureline commercial broiler breeder lines with high performance (in  
117 terms of meat production) characteristics. These lines are typically cross-bred by  
118 commercial poultry production systems in order to produce the modern broiler with  
119 desired characteristics (Anthony, 1998; Yang and Jiang, 2005). Differences in the  
120 pelvic limb musculature of these study groups have already been shown  
121 quantitatively, suggesting that differences in the gait characteristics of these lineages  
122 may exist (Paxton et al., 2010). Additionally, when the two purelines are compared at  
123 the farm level, Pureline A birds generally yield greater breast muscle mass per unit  
124 body mass and have lower average gait scores (poorer walking ability), whereas  
125 pureline B chickens tend to have a larger body mass (~30% difference in some cases),  
126 with generally higher gait scores (H. Paxton, unpublished data). We aim to  
127 determine whether these three lineages have adopted different locomotor strategies as  
128 a result of their altered morphology.

129  
130 In addition, studies have suggested an apparent instability in broiler chickens, which -  
131 - in line with the waddling gait of penguins (Kurz et al., 2008) -- has been considered,  
132 somewhat speculatively, as more susceptible to falls. Specifically, broiler chickens  
133 appear to have more excessive lateral motions than more ancestrally typical ground-  
134 running birds (Cavagna et al. 1977; Gatesy and Biewener, 1991; Rubenson et al.,  
135 2004). We present the first study to investigate, albeit with an admittedly simple  
136 metric, the dynamic stability of the modern broiler. We do this by considering their

137 gait variability and its potential role in locomotor stability (Winter, 1989; Holt et al.,  
138 1995; Dingwell and Cavanagh, 2001; Dingwell and Marin, 2006). By doing this, we  
139 aim to further highlight how morphological changes may have led to difficulties with  
140 locomotor stability in broiler chickens.

141

## 142 **Methods:**

143 Male commercial line birds (approximately 42 days old) were used in this study  
144 including two pureline commercial broiler breeder lines, referred to as pureline A and  
145 B respectively, and a commercial strain broiler (Table 1). The main morphological  
146 characteristics for these groups (collected from multiple cadaveric specimens) are also  
147 detailed in Table 2. These included breast muscle mass ( $\pm 0.1$ g; pectoralis; i.e.  
148 pectoralis major, and supracoracoideus; i.e. pectoralis minor; combined), girth ( $\pm$   
149 0.1cm), hip width ( $\pm 0.1$ mm), keel length ( $\pm 0.1$ mm) and total leg length ( $\pm 0.1$ mm).  
150 Hip width was taken as the distance between the trochanteric crests of the femora  
151 (birds were similarly positioned in each case), girth was measured around the  
152 circumference of the thorax of the bird (tucked under the wings), and the total leg  
153 length was taken as the sum of the individual pelvic limb bones (femur, tibiotarsus  
154 and tarsometatarsus), measured from the most proximal point to the most distal point  
155 on the medial or lateral side of the bone. The bird populations were all raised under  
156 the same management conditions to ensure that any differences found were not  
157 attributed to husbandry factors, which are well known to influence the growth and leg  
158 health of broilers (Sorenson et al. 1999; Su et al. 1999; Vestergaard and Sanotra,  
159 1999; Kestin et al. 2001; Scott, 2002; Dawkins et al. 2004; Mench, 2004; Brickett et  
160 al. 2007; Buijs et al. 2009). Those birds which were visibly lame or incapable of  
161 sustained walking were excluded from this study.

162

163 Motion capture was used to study individual birds using eight Qualisys MCH 500  
164 cameras (Gothenberg, Sweden) which were synchronised to a Kistler 9287B force  
165 plate (Kistler Instruments Ltd, Alton, UK). The trochanteric crest of the hip and the  
166 distal phalanx of the middle toe of each limb were marked with infrared-reflective  
167 motion capture markers, thereby simplifying each limb as a linear segment. The birds  
168 were encouraged to walk over the force plate (500Hz) parallel to the view of the  
169 cameras (167Hz) and the marker position and the ground reaction forces in the  
170 vertical, fore-aft and mediolateral directions were recorded. All the birds had known

171 body masses ( $\pm 0.1\text{kg}$ ), which were taken immediately after the trials for each  
172 individual were finished.

173

174 The kinematic and force plate data were then analysed using two computer  
175 programmes, Qualisys Track Manager (QTM) and Matlab (Mathworks, Natick, MA,  
176 USA). QTM formed a three-dimensional image of the markers' coordinates and these  
177 data were then further processed with the force plate data using custom Matlab  
178 software. All trials were processed, but those trials where there were large gap ranges  
179 between the coordinates or where the bird was distracted were removed before further  
180 analysis. The kinematic data were filtered (Winter et al., 1974) using a low-pass,  
181 zero-lag fourth-order Butterworth digital filter with a cut-off frequency of 10Hz. The  
182 same filter type was used for the ground reaction force data, with a cut-off frequency  
183 of 75Hz. The kinematic data (foot markers only) were used to identify foot down and  
184 foot off events and these identified steps were subsequently analysed. This also  
185 allowed us to investigate any possible asymmetries (i.e. left-right limb differences)  
186 that may exist in the broiler.

187

188 Ergonomic analysis was conducted in each step to quantify mechanical energy  
189 fluctuations and to calculate the mechanical work required to move the CoM. Since  
190 the chickens walked slowly, and did not necessarily start walking 'on cue', there may  
191 have been some baseline drift from the force plates (an unavoidable limitation of the  
192 sensors recording over longer periods of time). To check and correct for this  
193 possibility, we assumed that the birds supported their own body mass through  
194 consecutive strides and the vertical forces were corrected accordingly. In order to  
195 reduce the error in position over time, the initial velocity conditions were calculated  
196 following methods adapted from Daley et al. (Daley et al., 2007). A path-matching  
197 technique was used where the initial velocity calculated from the kinematic data was  
198 used as an initial guess, which was then corrected to provide a base match between  
199 the CoM position calculated using the kinematics over time and the CoM position  
200 calculated through integration of the force plate data. The initial velocity selected was  
201 the value which minimised the divergence (sum of the squared differences) between  
202 the two paths and these conditions were used to calculate CoM velocity and position  
203 by the double integration of the accelerations from the force plate data.

204

205 Observation of the broilers through the length of the trial showed that they rarely  
206 walked in a straight line. The fore-aft and mediolateral forces and the CoM velocity  
207 in these two directions could therefore be under/over-estimated dependent on the  
208 direction the bird was walking in relation to the plate. The forces were thus corrected  
209 based on the angle between the CoM velocity and the force plate coordinate system.  
210 Peak forces were recorded along with step width and step length, which were defined  
211 from the lateral position of the CoM and the fore-aft position of the CoM respectively.  
212 CoM height was defined as the average CoM position across a step. The leg length  
213 (in metres) and the leg angle (in degrees) were calculated using the CoM position and  
214 the toe marker position data. Based on basic trigonometry, if dX refers to the  
215 horizontal distance between the CoM position and the toe marker and dZ refers to the  
216 vertical distance between the CoM position and the toe marker, leg length =  $\sqrt{(dZ^2 +$   
217  $dX^2)}$  and leg angle =  $180 - (\tan^{-1}(dZ / dX))$ . The track way width (measured separate  
218 to step width, in order to consider the outward splay of the lower leg) was also  
219 calculated, measured as the lateral separation between the markers on the feet during  
220 the double support phase and expressed as a fraction of CoM height. The vertical and  
221 lateral displacement of the foot during swing was also considered-- i.e. the peak  
222 displacement of the foot during swing relative to its position during stance, as a  
223 measure of limb circumduction and to investigate foot path variability.

224

225 The average horizontal velocity, duty factor (the fraction of the total stride cycle  
226 during which the foot is in contact with ground) (Biewener, 1983; Alexander, 1985;  
227 McMahon, 1985; Taylor, 1985) and the Froude number for each step were also  
228 recorded. The Froude number (Fr) was calculated as  $(Fr = v^2 g^{-1} l^{-1})$ , where  $g = 9.81 \text{ m}$   
229  $\text{s}^{-2}$ ,  $l$  = mean hip height and  $v$  = mean velocity. The mechanical cost of transport  
230 (MCoT;  $\text{J kg}^{-1} \text{m}^{-1}$ ) was also considered ( $\text{MCoT} = W \text{ m}^{-1} \text{L}^{-1}$ ), where  $W$  = absolute  
231 work done (J),  $m$  = body mass (kg) and  $L$  = step length (m).

232

233 Only data that were considered steady state were used to draw results and conclusions  
234 in this study, as it was important to establish typical cyclical movements in these birds  
235 without halting or other perturbations. Steady state was defined based on the ground  
236 reaction force impulse and the change in CoM velocity over a step. A fore-aft  
237 impulse of  $0 \pm 2 \text{ N s}$  and a CoM velocity change of less than 35% during a step were  
238 used. The data were then sorted into eight speed categories for statistical analysis. A

239 minimum of five data points per speed category per bird group was set in order to  
240 consider their contribution to the relationships observed as valid. Data were omitted  
241 where this condition could not be met. Whilst our statistical tests could manage a  
242 limited number of data points, due to the unsteady nature of these birds and our  
243 objective to establish normal gait characteristics, we wanted to ensure the results were  
244 not influenced by potentially more spurious values. The computer package SPSS  
245 (Statistical Package for the Social Sciences, Chicago, Illinois) was used for the  
246 statistical analysis to check for differences between the relationships of bird group,  
247 speed and the right or left foot with step width, step length, step frequency, leg length  
248 and angle, displacement of the foot, trackway width, peak forces, CoM energies, work  
249 done and the mechanical cost of transport (MCoT) between bird groups. The data  
250 were analyzed using a linear mixed model, with speed, the foot used in each step  
251 (right/ left) and the bird group (Pureline A, Pureline B and the commercial broiler), as  
252 the fixed effects, the individual bird as the random effect and each factor previously  
253 mentioned (MCoT, step frequency, etc.) as the dependent variable. This procedure  
254 allowed the data to exhibit correlated and non-constant variability. It estimated the  
255 effects of speed, foot used and the bird group on the dependent variables while  
256 adjusting for correlation due to repeated trials on each bird. P-values ( $\leq 0.05$  deemed  
257 significant) were taken into consideration when analyzing the data and drawing  
258 conclusions.

259

260 Additionally, as a measure of kinematic variability, the coefficient of variation (ratio  
261 of the standard deviation to the mean) for a number of variables was used in order to  
262 have a comparable measure of dispersion among the three groups. To test for  
263 differences in morphology, a one-way analysis of variance (ANOVA) was used to test  
264 the differences among group means for significance. To validate the use of this  
265 parametric test, assumptions of normal distribution and equal variances were tested  
266 using the Kolmogorov-Smirnov statistic and the Levene's test (results displayed in  
267 Table 2). Where these assumptions were not met, an independent Kruskal-Wallis test  
268 was used. If significant differences were found ( $p$ -value  $\leq 0.05$ ), a Bonferroni post  
269 hoc test was used to determine which groups were significantly different from each  
270 other. Regression analyses were also used to determine the relationship between CoM  
271 velocity and duty factor (Fig. 1), as well as any significant slope differences between  
272 step variables (Fig. 3).



273

274 We report the locomotor attributes of the modern broiler at their ‘preferred’ walking  
275 speed (mean velocity =  $0.25 \pm 0.02 \text{ m s}^{-1}$ ) -- i.e. the speed category used most  
276 commonly by the three groups (approximately 40% of the data in each group), as well  
277 as any significant relationships with speed. Although work done is a scalar quantity,  
278 we consider the absolute values for work done as separate components for each  
279 direction of motion in order to fully evaluate the mechanical work based on the  
280 magnitude and direction of each force vector.

281

282 All birds were examined post mortem to identify any pathological condition that may  
283 have affected the observed gait, in particular, femoral head necrosis, severe valgus  
284 deformities (greater than 45 degrees is associated with lameness; Letterier and Nys,  
285 1992), tibial dyschondroplasia, or gross swelling of the joints.

286

### 287 **Results:**

288 Gross abnormalities were not found during post-mortem examination. We therefore  
289 considered these birds to have normal limb function based on the absence of any gross  
290 pathology. It must be noted that satisfying the conditions of steady state led to  
291 differing amounts of data being excluded from this study. The largest number of steps  
292 were discounted from pureline A (47%; 308 steps out of 661 ‘unsteady’ steps), with  
293 33% (221 steps out of 661 ‘unsteady’ steps) and 20% (132 steps out of 661 ‘unsteady’  
294 steps) being discounted from pureline B and the broiler data sets respectively.  
295 Collectively this accounted for 66% of the total number of steps (999) originally  
296 collected.

297

298 Very subtle morphological differences existed between the populations of our study  
299 birds (Table 2), with only significant differences in hip width ( $F_{2,27} = 16.5$ ,  $p <$   
300  $0.001$ ) and breast muscle mass ( $p < 0.001$ ). Pureline B birds had wider hips than  
301 both the broiler and pureline A populations. Breast muscle mass varied significantly  
302 between the three groups. Pureline A had an additional 2% body mass of breast  
303 muscle mass compared to pureline B and the broiler population, but total leg length  
304 was not statistically different between groups. Across all chicken populations, girth  
305 was approximately 30% larger than leg length across all bird populations. CoM  
306 height also varied between groups ( $F_{2,319.4} = 85.3$ ,  $p < 0.001$ ; Table 1). Pureline B

307 chickens had the smallest CoM height, which was ~5% smaller than pureline A birds  
308 and ~10% smaller than the broiler population.

309

310 Initial analysis of the CoM velocity and duty factor (Fig. 1) shows that the general  
311 trend among all populations was for CoM velocity to increase with a decrease in duty  
312 factor, as expected. The broiler population, which had the largest body mass (Table  
313 1), seemed able to achieve a much broader speed range than the pureline populations,  
314 with a few broiler individuals reaching speeds between 0.6-1.1 m s<sup>-1</sup>. The largest  
315 fluctuations in CoM velocity can be seen in the lateral component (Table 3), with the  
316 highest fluctuations reported in pureline A chickens. This component also differed  
317 dependent on the foot used (larger for right steps;  $F_{1, 311} = 6.49$ ,  $p = 0.011$ ) and was  
318 generally smaller (~16%) in pureline A birds ( $F_{2, 311} = 5.59$ ,  $p = 0.004$ ).

319

320 An increase in forward velocity was achieved by increasing step length and step  
321 frequency (Fig. 2), with a preference to increase step frequency at a slightly faster rate  
322 than step length (based on significant differences between the slope values of the two  
323 lines,  $p < 0.001$ ). Stance duration also decreased, whereas swing duration was kept  
324 almost constant (Fig. 3). Step width decreased with an increase in speed, with the  
325 magnitude of this effect varying significantly between bird groups. Step width  
326 decreased at a faster rate in pureline B chickens and to a lesser degree in pureline A  
327 chickens and the broiler population. Step width changes were more variable than  
328 changes in step length across all chicken populations. This is seen more clearly if we  
329 consider these values at the birds' preferred walking speed (Table 4). Variability in  
330 step width is shown to be approximately two times higher (~30%) than the variability  
331 in step length (~15%). Pureline B birds took longer steps than both the pureline A  
332 and the broiler populations ( $F_{2, 85.2} = 7.58$ ,  $p = 0.001$ ), and this corresponded with a  
333 significantly lower step frequency ( $F_{2, 58.0} = 5.89$ ,  $p = 0.005$ ). Trackway width was  
334 not significantly different between groups ( $F_{2, 140.0} = 2.66$ ,  $p = 0.073$ ), remaining  
335 approximately 51% of mean hip height across all bird populations (Table 3).

336

337 Analysis of the chickens' general limb motions across a step cycle (Fig. 4) shows that  
338 leg angle did not change more than approximately 10 degrees through the stance  
339 phase of locomotion and was relatively consistent across steps (given the small  
340 standard deviations), in contrast to the swing phase of locomotion where leg angle

341 was much more variable. Changes in overall leg length were small between stance  
342 and swing phases, with the more noticeable differences between these events seen in  
343 the broiler population. This relates to the pathway of the feet during swing (Table 3),  
344 with the broiler population lifting their feet roughly a third higher than pureline B  
345 birds with each step. In all bird populations, circumduction of both limbs was evident  
346 ( $F_{2, 303} = 5.49$ ,  $p = 0.005$ ) with a significantly larger lateral displacement of the right  
347 foot ( $F_{1, 303} = 1.97$ ,  $p = < 0.001$ ). This did not correlate with lateral velocity. The  
348 largest lateral displacement of both limbs was seen in pureline B birds, which also had  
349 a significantly larger sweep angle ( $F_{2, 318} = 11.49$ ,  $p = < 0.001$ ; Table 4). Thus  
350 pureline B birds took longer steps while drawing their feet further away from the body  
351 but at a lower elevation than broilers did.

352

353 The resulting ground reaction forces (Fig. 5) show our study birds all tended to  
354 support forces equal to or slightly more than their body weight during a step, with  
355 peak vertical forces (Table 4) not exceeding 1.4 times body weight. These peak  
356 vertical forces were significantly larger in the broiler population (~15%) compared to  
357 pureline A ( $F_{2, 67.9} = 6.31$ ,  $p = 0.003$ ). Mediolateral forces generally exceeded fore-aft  
358 forces, with both representing 10-15% of the peak vertical force. The subsequent  
359 direction of the mediolateral force corresponded to which foot was placed on the  
360 ground, with a general trend for birds to roll laterally over their supporting leg with  
361 each step. These forces were also larger in the right limb in all bird populations ( $F_{1, 296.0} = 73.2$ ,  $p = < 0.001$ ), which was more evident in pureline B and the broiler  
362 population, where the mediolateral forces were generally two times larger in the right  
363 limb (Table 4). Overall, the broiler population experienced significantly larger  
364 (~30%) mediolateral forces than the pureline groups ( $F_{2, 84.3} = 10.3$ ,  $p = < 0.001$ ).

366

367 The limb motions used by the birds led to a minimal change in centre of mass  
368 displacement (Fig. 5), which was generally less than 5% of hip height, corresponding  
369 to very small changes in gravitational potential energy (GPE). Fluctuations in kinetic  
370 energy (KE) were negligible and changes in CoM energies across all bird populations  
371 were small (fluctuating around zero) but extremely variable, with standard deviations  
372 much larger than value means (Table 4).

373

374 The subsequent work done in the vertical and mediolateral directions was  
375 significantly smaller in pureline A ( $F_{2, 48.4} = 9.32$ ,  $p = < 0.001$  and  $F_{2, 194.0} = 14.2$ ,  $p =$   
376  $< 0.001$  respectively). Across all birds, the work done in the mediolateral direction  
377 was of similar magnitude to the work done in the fore-aft direction. Despite the subtle  
378 differences in locomotor dynamics observed between lines, the MCoT (work done per  
379 kg body mass over a step) was not significantly different between groups ( $F_{2, 68.5} =$   
380  $1.43$ ,  $p = 0.247$ ; Fig. 6). Remarkably, when compared to other ground-running birds  
381 (ostrich and guineafowl) for which adequate data exist, the MCoT appears to follow  
382 simple body-size scaling patterns (i.e., larger species toward the bottom of the plot)  
383 rather than showing a sharp divergence between specialized running birds and the  
384 more sedate, artificially selected domestic chickens.

385

### 386 **Discussion:**

387 Leg weakness (encompassing lameness and poor walking ability) is a topical issue  
388 concerning the health and welfare of the modern broiler. Unfortunately, there are  
389 many difficulties associated with establishing the cause of leg weakness in poultry  
390 and very little understood about their gait. Our study therefore had three major  
391 purposes: 1) to determine how selection has actually altered the way that production  
392 line chickens walk; 2) to determine whether any changes in locomotor dynamics  
393 require excessive work, requiring more mechanical energy from the limb muscles;  
394 and 3) to establish whether a change in morphology in these chickens leads to  
395 different locomotor mechanisms. Hence, our study helps to illuminate how  
396 morphological changes may have contributed to lameness or other difficulties with  
397 locomotion in the broiler chicken.

398

399 It is well known that distinct selection pressures are applied on a line by line basis, so  
400 we would expect morphological differences to exist amongst our three study groups.  
401 Consequently, we found subtle differences including a large pectoral muscle mass,  
402 accounting for approximately 20% of total body mass (~ 2% larger in pureline A  
403 chickens compared to pureline B and the broiler population), and differences in hip  
404 width between the study populations (larger in pureline B). This disproportionate  
405 increase in pectoral muscle mass to body mass is well documented (e.g. Havenstein et  
406 al., 1994a, 1994b; Lilburn 1994), but under natural conditions is usually only seen in  
407 other Galliformes that require this large muscle to power a rapid take-off; e.g. grouse

408 or partridges (Hartman, 1961; Tobalske and Dial, 2000). Broiler chickens are  
409 essentially flightless at any stage of ontogeny (pers obs., all authors), and previous  
410 literature has suggested that the influence of this alone may put greater demands on  
411 the pelvic limb muscles, affecting the birds' walking ability (Abourachid, 1993; Corr  
412 et al., 2003b). The logic underlying this presumed relation between pectoral mass and  
413 pelvic limb mechanics is that a more cranially positioned CoM requires more limb  
414 muscle effort for support. This is not uncommon among other bipeds, where the  
415 potential displacement of the CoM (greatly influenced by body size and shape) has  
416 been found to have a strong influence on aspects of locomotion (e.g. postural stability  
417 in humans, Fregly et al., 1968, Corbeil et al., 2001), such as a wider pelvis (pureline B  
418 birds), in combination with the large pectoral muscle mass (Hutchinson, 2004). Yet it  
419 remains unclear how other morphological changes may affect gait.

420

421 Initial evaluation of the gait of our three study populations of chickens reveals  
422 common features with other avian bipeds (guineafowl, Gatesy, 1999; quail, Reilly,  
423 2000; other avian taxa, Gatesy and Biewener, 1991; Abourachid, 2000, 2001;  
424 Rubenson et al., 2004; Nudds et al., 2010) including typical associations seen with  
425 increased speed, such as a preference to increase step frequency at a slightly faster  
426 rate than step length, a decrease in step width and a decrease in stance duration. This  
427 also coincides with a relatively constant swing phase duration. However, our study  
428 birds were still walking at substantially slower speeds than other ground-running birds  
429 and even slower than waddling birds, such as ducks (Usherwood et al., 2008) and  
430 penguins (Griffin and Kram, 2000), which also have relatively short legs and exhibit a  
431 comparatively narrower range of speeds to ground-running birds. The average duty  
432 factor of the commercial lines studied ( $0.79 \pm 0.05$ ) is still representative of other  
433 slow-walking animals/ humans (Alexander, 1989; Reilly, 2000; Aerts et al., 2000;  
434 Zani et al., 2005).

435

436 Typically in human gait studies, individuals who walk more slowly than healthy  
437 controls are deemed to have some form of gait disability, but slowing down can  
438 simply reflect a 'safer' and more 'tentative' strategy for moving around (Winter,  
439 1989; Powers et al., 1999; Dingwell and Cavanagh, 2001). This assessment of  
440 disability is a common subjective view of locomotion in human obesity studies,  
441 because obese humans have a similar problem of carrying extra body mass (Messier,

442 1994; Messier et al., 1996; Browning and Kram, 2007; Spyropoulos et al., 1991).  
443 Recent studies have shown that slower walking velocities serve to increase dynamic  
444 stability (Dingwell and Marin, 2006; England and Granata, 2007) and consequently  
445 domestic chickens may benefit from reduced falling risks at the cost of increased  
446 variability in their locomotor movements. However, it has been shown that  
447 individuals can still display decreased stability despite this compensatory mechanism  
448 (Kang and Dingwell, 2008). Approximately 65% of the total data were excluded from  
449 this study (did not meet criteria for steady state) due to birds walking at even slower  
450 speeds than reported here, and halting significantly between steps. These halting  
451 movements were often sporadic in nature, with no association to step number or trial  
452 number, and therefore the reasons for this random unsteadiness were difficult to  
453 ascertain. It could be related to physical constraints, such as decreased strength (De  
454 Vita and Hortobagyi, 2000) or flexibility (Kerrigan et al., 2001), or even exercise  
455 fatigue, which is known to affect gait in humans with evidence of poorer dynamic  
456 stability (Wojtys et al., 1996; Yoshino et al., 2004; Granata and Gottipati, 2008).  
457 From personal observations, the chickens often became breathless with the mild  
458 exertion of walking, and thus needed frequent rest between trials. The percentage to  
459 live weight of hearts and lungs of broilers are much smaller as a result of selection  
460 (Havenstein et al., 1994a,1994b; Havenstein et al., 2003; Schmidt et al., 2009), and so  
461 the influences of their cardiovascular system and perhaps a reduced ‘cardiovascular  
462 fitness’ on their locomotor ability are important to consider in future studies.  
463  
464 Irrespective of this, a few individuals of the broiler population were able to achieve a  
465 much broader speed range, which is perhaps surprising, considering that a larger body  
466 mass is typically associated with poorer walking ability (Kestin et al., 1999, 2001;  
467 Bokkers et al., 2007; Naas et al., 2009). The question then remains as to whether this  
468 broad speed range is indicative of a ‘good’ walking bird and/ or whether it simply  
469 reflects differences in the gait characteristics of these commercial lines? Firstly, the  
470 variation in the lateral velocity of the CoM was substantially smaller in the broiler  
471 population compared to the pureline birds. If we use this reduced variation as an  
472 indicator of improved lateral balance in walking broilers (Winter, 1989; Holt et al.,  
473 1995), this supports our initial suggestion that the broiler is perhaps a ‘better’ walking  
474 bird. The differences in gait parameters seen (Table 4) were generally quite subtle,  
475 with the main changes seen in pureline B birds, which have a more crouched limb

476 posture (lower CoM height for same total leg length). Their longer step length, lower  
477 step frequency and larger sweep angle are typical of this postural change (Gatesy and  
478 Biewener, 1991). This is also associated with significantly greater circumduction and  
479 less vertical displacement of the foot during swing. Two plausible explanations for  
480 this crouched limb posture may be their wider pelvis and a more cranially positioned  
481 CoM, although more detailed biomechanical analyses are needed to test this  
482 speculation. However, difficulty in walking was perhaps more evident in pureline A  
483 birds (48% of data not meeting requirements for steady state), which carry more  
484 breast muscle mass compared to the other populations (Table 2). Pureline A birds are  
485 ‘front heavy’, with the breast muscle mass concentrated at the cranial end of the keel.  
486 We therefore suggest that not just the breast muscle mass, but also the way it is  
487 distributed along the length of the keel, potentially has a major effect on the way that  
488 domestic chickens walk. To test this speculation, future studies could test whether  
489 alterations in CoM caused by such changes in morphology cause alterations in joint  
490 moments or tissue forces.

491

492 Across all bird populations, we found that our study chickens generally took shorter  
493 steps than other ground-running birds, related to their much slower velocities, and had  
494 an extremely wide trackway width, substantially (approximately 18%) larger than hip  
495 width. As a result, these birds held their feet in a position more lateral to the hip,  
496 which allows them to increase their lateral base of support and also provides a larger  
497 potential for mediolateral motions of the CoM (Donelan et al., 2001). This lateral  
498 motion was seen across all commercial lines and is a common feature of waddling  
499 birds, usually attributed to their short legs and wide base of support (Pinshow et al.,  
500 1977; Griffin and Kram, 2000; Abourachid, 2001; Usherwood, 2008; Nudds et al.,  
501 2010). Our study’s commercial line birds moved their CoM approximately 23% of  
502 hip height with each step and subsequently rolled their body laterally over the planted  
503 foot whilst the contralateral limb was in swing phase. Adjusting step width and step  
504 length are also key to redirecting the CoM to remain within the base of support and  
505 prevent falling (Winter, 1991), and, similar to humans, the chickens studied have a  
506 more variable step width than step length. These chickens may rely on more precise  
507 foot placement to control their lateral stability (Kuo, 1999; Bauby and Kuo, 2000), in  
508 contrast to penguins, which have been shown to have a more consistent step width and  
509 rely more on modulation of their trunk instead (Kurz et al., 2008). Further

510 perturbation studies are needed to test if this variance is associated with precise  
511 placement of the foot and is not simply the result of a lack of control or instability,  
512 which is commonly observed in these broiler populations. If waddling clearly  
513 provides some benefits for penguins (Griffin and Kram, 2000; Kurz et al., 2008), what  
514 does waddling mean for the modern broiler and its generation lines?

515

516 The observed lateral motions resulted in high mediolateral forces, which generally  
517 exceeded fore-aft forces across all bird populations and were also substantially larger  
518 in the right limb. The reason for this asymmetry is not clear, but may be linked to  
519 limb dominance and a subsequent preference to use the right limb for balance control,  
520 because our study birds also showed greater lateral displacement of the right foot.  
521 Similar to elderly individuals with imbalance, domestic chickens may swing the  
522 contralateral limb more laterally to counterbalance the evident lateral roll over the  
523 supporting leg (Chou et al., 2003). This would explain why the subsequent  
524 mediolateral forces experienced by the left limb were substantially reduced. The  
525 mediolateral forces were significantly larger in the broiler population, which is likely  
526 attributable to their evidently greater limb motions, with the broiler population lifting  
527 their limbs significantly higher during swing and consequently exhibiting the largest  
528 changes in leg length. A gradual decline in leg length and leg angle is still evident  
529 through the stance phase of all three bird groups, which probably is associated with  
530 slight flexion-extension of the knee (Jacobsen and Hollyday, 1982; Johnston and  
531 Bekoff, 1992) and toes (Reilly, 2000), supported by our personal observations during  
532 these experiments. The angle of the limb was highly variable during the swing phase,  
533 which likely corresponds to the high variation in the vertical and lateral displacement  
534 of the foot during swing before being placed on the ground to establish a new base of  
535 support for gait progression. The significantly greater vertical forces reported in the  
536 broiler compared to pureline A are presumably the direct result of this group of birds  
537 tending to lift their feet much higher off the ground with each step. Pureline B birds  
538 still experienced similar peak forces, despite their more crouched limb posture, which  
539 would usually be considered as a strategy to reduce the peak vertical forces  
540 experienced by the limb, in a manner similar to bent-knee running in humans  
541 (McMahon et al., 1987). This group may have a more plodding gait, involving  
542 greater impacts of the feet with the ground early in stance phase.

543



544 If the chicken populations studied were indeed walking steadily over ground, the  
545 kinetic energy and potential energy changes would be the same at the beginning and  
546 the end of each step and would fluctuate around zero (Alexander and Jayes, 1978;  
547 Griffin et al., 2004). The changes in CoM energies did indeed fluctuate around  
548 approximately zero, but were extremely variable, highlighting the apparent instability  
549 of walking in purelines and broilers. It is therefore difficult to determine whether  
550 these birds do similar quantities of positive and negative work, and so how much their  
551 muscles may be actively contributing to each step. The broiler population appeared to  
552 have significantly different kinetic energy changes to the pureline B population, but  
553 we hesitate to make inferences from these data. In all three commercial lines, the  
554 fluctuations in KE were small and the CoM displacement across a step was also  
555 minimal, reflecting small changes in GPE. Passive pendular mechanics are well used  
556 among other cursorial birds and other terrestrial animals (Cavagna et al., 1977;  
557 Heglund et al., 1982; Blickhan and Full, 1992; Muir et al., 1996; Griffin and Kram,  
558 2000; Ahn et al., 2004; Rubenson et al., 2004; Biewener, 2006; Biknevicus and  
559 Reilly 2006), but this is usually achieved at intermediate walking speeds in birds  
560 (Cavagna et al., 1977; Rubenson et al., 2004). The capacity for these commercial line  
561 birds to therefore recover mechanical energy through pendular mechanics is likely to  
562 be low as a direct result of their slow walking speeds. This has also been reported in  
563 other slow-walking animals (geckos, Farley and Ko, 1997; alligators, Wiley et al.,  
564 2004; tortoise, Zani et al., 2005; elephants, Ren and Hutchison, 2008).

565  
566 The subtle gait differences among this study's three groups led to varying amounts of  
567 work done on the CoM in different directions. For example, the largest amount of  
568 mediolateral work was done by the broiler population, whereas the shorter steps and  
569 lower peak vertical forces of the pureline A birds allowed this group to do less work  
570 in the vertical direction. Despite the subtle differences in gait we report, these  
571 commercial line birds not only have similar mechanical costs of transport, but when  
572 compared to the ostrich and guineafowl, appear to do no greater mechanical work.  
573 The mechanical cost of transport of these commercial lines is substantially lower than  
574 that of guineafowl at the same walking speed, and our results are consistent with the  
575 widely accepted evidence that the cost of transport decreases with increasing body  
576 size (Langman et al., 1995). The large lateral motions of our study chickens result in  
577 similar amounts of work done in the lateral and fore-aft direction, but it is possible

578 that the relatively small limb movements we report here compensate for the  
579 mechanical work of moving the body CoM in the lateral direction. Constraining step  
580 length also has the additional advantage of reducing mechanical work, because step  
581 length increases mechanical work to a greater extent than step width (Donelan et al.,  
582 2001, 2002). The observed waddling movements therefore do not, as sometimes  
583 thought, require excessive work. However, slight caution should be taken when  
584 interpreting these values. It must be noted that the mCoT was calculated using the  
585 combined limbs method, which is known to underestimate the external mechanical  
586 work done in walking (Donelan et al., 2002). As a result, these values are likely to be  
587 an underestimation of the true magnitude, in broilers, guineafowl and ostrich,  
588 especially when the mechanical work performed by each individual pelvic limb is  
589 unknown.

590

591 Unfortunately, a low mechanical cost of transport does not necessarily correlate with  
592 low metabolic costs. Contradictory patterns exist in the literature, with mechanical  
593 energy recovery associated with low and high metabolic costs. These metabolic costs  
594 can be associated with a number of factors, including step-to-step transitions or step  
595 width (Donelan et al., 2002), the cost of muscular force generation (Kram and Taylor,  
596 1990; Kram et al., 1997; Hoyt et al., 2000; Griffin et al., 2003), the swing phase of  
597 locomotion (Marsh et al., 2004), or even slow walking speeds (Langman et al., 1995).  
598 Indeed, the absence or poor use of pendulum-like energy exchange that we report  
599 here, as well as the active, lateral limb movement of their limbs that we suggest  
600 chickens use for stability may also exact a metabolic cost (Donelan et al., 2001;  
601 Shipman et al., 2002). Hence, the relationship between the mechanical work and the  
602 metabolic cost of locomotion is difficult to assess and has not been measured in the  
603 modern broiler chicken. Testing this issue is particularly difficult because the  
604 commercial chicken lines used in this study are unable to walk steadily and  
605 consistently long enough to obtain reliable direct measurements of metabolic cost;  
606 hence either validated indirect measurements on other birds or else novel ways of  
607 measuring metabolic cost directly are needed to determine how costly walking is for  
608 these chickens.

609

610 Our study has shown how subtle changes in the morphological characteristics of the  
611 broiler and its generation lines can lead to changes in locomotor dynamics. We have

612 highlighted the potential mechanical benefits of slow walking speeds, a wide base of  
613 support and large lateral, essentially ‘waddling’ motions for the broiler, as well as  
614 showing that the seemingly awkward gait of the broiler may not be as ‘inefficient’ as  
615 previously thought. Actually, the gait of the modern broiler shows rather surprising  
616 similarities to other avian bipeds. However, the influence of broilers’ unusual three-  
617 dimensional movements on the occurrence of skeletal pathologies is unknown. These  
618 large lateral motions, which appear to be essential for the forward progression of the  
619 broiler, could play a role in the development of skeletal pathologies; a speculation that  
620 deserves testing in the future.

621

### 622 **Acknowledgements**

623 We thank Cobb-Vantress Inc., especially Roy Mutimer and Kate Barger, for their  
624 support on this project which was part of a CASE Industrial Partnership PhD  
625 studentship to H.P., funded by the Biotechnology and Biological Sciences Research  
626 Council (BBSRC) of the United Kingdom. Additional support from BBSRC grant  
627 number BB/I02204X/1 to J.R.H. and M.A.D. is acknowledged. Other members of the  
628 Structure & Motion Lab are thanked for their assistance during experiments and data  
629 analysis, including but not limited to Sharon Warner and Rebecca Fisher. We also  
630 thank undergraduate student Will Parker for assistance in experiments and dissections.  
631 Two anonymous reviewers gave helpful constructive criticisms that improved this  
632 manuscript.

633

### 634 **References:**

635 **Abourachid, A.** (2001). Kinematic parameters of terrestrial locomotion in cursorial  
636 (ratites) swimming (ducks) and striding (quail and guinea fowl). *Comp. Biochem.*  
637 *Physiol. A: Mol. Integr. Physiol.* **131**, 113-119.

638

639 **Abourachid, A.** (2000). Bipedal locomotion in birds: the importance of functional  
640 parameters in terrestrial adaptation in Anatidae. *Can. J. Zoo.* **78**, 1994-1998.

641

642 **Abourachid, A.** (1993). Mechanics of standing in birds: functional explanation of  
643 lameness problems in giant turkeys. *Br. Poult. Sci.* **34**, 887-898.

644

645 **Aerts, P., Van Damme, R., Van Elsacker, L.** (2000). Spatio-temporal gait  
646 characteristics of the hind-limb cycles during voluntary bipedal and quadrupedal  
647 walking in bonobos (*Pan paniscus*). *Am. J. Phys. Anthropol.* **111**, 503-517.  
648

649 **Ahn, A.N., Furrow, E., Biewener, A.A.** (2004). Walking and running in the red-  
650 legged running frog, *Kassina maculate*. *J. Exp. Biol.* **207**, 399-410.  
651

652 **Alexander, R.M.** (1989). Optimisation and gaits in the locomotion of vertebrates.  
653 *Physiol. Rev.* **69**, 1199-1227.  
654

655 **Alexander, R.M.** (1985). The maximum forces exerted by animals. *J. Exp. Biol.*  
656 **115**, 231-238.  
657

658 **Alexander, R.M., Jayes, A.S.** (1978). Vertical movements in walking and running.  
659 *J. Zool.* **185**, 27-40.  
660

661 **Anthony NB** (1998). A review of genetic practices in poultry: efforts to improve  
662 meat quality. *J. Muscle Food.* **9**, 25-33.  
663

664 **Arthur, J.A., Alburns, G.A.A.** (2003). Industrial perspective on problems and issues  
665 associated with poultry breeding. In: *Poultry Genetics, Breeding and Biotechnology*.  
666 Wallingford, UK: CABI Publishing Co.  
667

668 **Barton, N.F.** (1994). Breeding meat type poultry for the future targets for selection,  
669 limits to performance and market requirements for chicken. In: *Proc 9th Eur Poult*  
670 *Conf, Glasgow, UK*, 33-38.  
671

672 **Bauby, C.E., Kuo, A.D.** (2000). Active control of lateral balance in human walking.  
673 *J. Biomech.* **33**, 1433-1440.  
674

675 **Bennett, R.M., Christiansen, K., Clifton-Hadley, R.S.** (1999). Direct costs of  
676 endemic diseases of farm animals in Great Britain. *Vet Rec.* **145**, 376-377.  
677

678 **Bessei, W.** (2006). Welfare of broilers: a review. *W. Poult. Sci. J.* **62**, 455-466.

679

680 **Biewener, A.A.** (2006). Patterns of mechanical energy change in tetrapod gait:  
681 pendula, springs and work. *J. Exp. Zool.* **305**, 899-911.

682 .

683 **Biewener, A.A.** (1983). Allometry of quadrupedal locomotion: The scaling of duty  
684 factor, bone curvature and limb orientation to body size. *J. Exp. Biol.* **105**, 147-171.

685

686 **Biknevicius, A.R., Reilly, S.M.** (2006). Correlation of symmetrical gaits and whole  
687 body mechanics: debunking myths in locomotor biodynamics. *J. Exp. Zool.* **305**, 923-  
688 934.

689

690 **Bizeray, D., Leterrier, C., Constantin, P.** (2000). Typology of activity bouts in the  
691 broiler chicken: A new approach for simplifying observational methods. *Br. Poult.*  
692 *Sci.* **42**, S11-12.

693

694 **Blickhan, R., Full, R.J.** (1992) Mechanical work in terrestrial locomotion. In:  
695 *Biomechanics: A Practical Approach*, Oxford University Press.

696

697 **Bokkers, E., Zimmerman, P.H., Bas Rodenburg, T., Koene, P.** (2007). Walking  
698 behaviour of heavy and light broilers in an operant runway test with varying durations  
699 of feed deprivation and feed access. *Appl. Anim. Behav. Sci.* **108**, 129-142.

700

701 **Bradshaw, R.H., Kirkden, R.D., Broom, D.M.** (2002). A review of the aetiology  
702 and pathology of leg weakness in broilers in relation to their welfare. *Avian Poult.*  
703 *Biol. Rev.* **13**, 45-103.

704

705 **Brickett, K.E., Dahiya, J.P., Classen, H.L., Gomis, S.** (2007). Influence of dietary  
706 nutrient density, feed form, and lighting on growth and meat yield of broiler chickens.  
707 *Poult. Sci.* **86**, 2172-2181.

708

709 **Browning, R.C., Kram, R.** (2007). Pound for pound: Working out how obesity  
710 influences the energetic of walking. *J. Appl. Physiol.* **106**, 1755-1756.

711

712 **Buijs, S., Keeling, L., Rettenbacher, S., Van Pouke, E., Tuytens, F.A.M.** (2009).  
713 Stocking density effects on broiler welfare: identifying sensitive ranges for different  
714 indicators. *Poult. Sci.* **88**, 1536-1543.  
715  
716 **Cavagna, G.A.** (1975). Force platforms as ergometers. *J. Appl. Physiol.* **39**, 174-  
717 179.  
718  
719 **Cavagna, G.A., Heglund, N.C., Taylor, C.R.** (1977). Mechanical work in terrestrial  
720 locomotion: Two basic mechanisms for minimizing energy expenditure. *Am. J.*  
721 *Physiol.* **233**, R243-R261.  
722  
723 **Cavagna, G.A., Thys, H., Zamboni, A.** (1976) The sources of external work in level  
724 walking and running. *J. Physiol.* **262**, 639-657.  
725  
726 **Chou, L.S., Kaufman, K.R., Hahn, M.E., Brey, R.H.** (2003). Mediolateral motion  
727 of the center of mass during obstacle crossing distinguishes elderly individuals with  
728 imbalance. *Gait Post.* **18**, 125-133.  
729  
730 **Corbeil, P., Simoneau, M., Rancourt, D., Tremblay, A., Teasdale, N.** (2001).  
731 Increased risk for falling associated with obesity: mathematical modeling of postural  
732 control. *IEEE Trans. Neural. Syst. Rehabil. Eng.* **9**, 126-136.  
733  
734 **Corr, S.A., McCorquodale, C., McDonald, J., Gentle, M., McGovern, R.** (2007).  
735 A force plate study of avian gait. *J. Biomech.* **40**, 2037-2043.  
736  
737 **Corr, S.A., Gentle, M.J., McCorquodale, C.C., Bennett, D.** (2003a). The effect of  
738 morphology on the musculoskeletal system of the modern broiler. *Anim. Welfare* **12**,  
739 145-157.  
740  
741 **Corr, S.A., Gentle, M.J., McCorquodale, C.C., Bennett, D.** (2003b). The effect of  
742 morphology on walking ability in the modern broiler: a gait analysis study. *Anim.*  
743 *Welfare* **12**, 159-171.  
744

745 **Corr, S.A., McCorquodale, C.C., Gentle, M.J.** (1998). Gait analysis of poultry.  
746 *Res. Vet. Sci.* **65**, 233-238.  
747  
748 **Daley, M.A., Felix, G., Biewener, A.A.** (2007) Running stability is enhanced by a  
749 proximo-distal gradient in joint neuromechanical control. *J. Exp. Biol.* **210**, 383-394.  
750  
751 **Danbury, T.C., Weeks, C.A., Chambers, J.P., Waterman-Pearson, A.E., Kestin,**  
752 **S.C.** (2000). Self-selection of the analgesic drug carprofen by lame broiler chickens.  
753 *Vet. Rec.* **146**, 307-311.  
754  
755 **Darwin, C.** (1859). On the Origin of Species by Means of Natural Selection, or the  
756 Preservation of Favoured Races in the Struggle for Life. London: John Murray.  
757  
758 **Dawkins, M.S., Donnelly, C.A., Jones, T.A.** (2004). Chicken welfare is influenced  
759 more by housing conditions than by stocking density. *Nature* **427**, 342-344.  
760  
761 **De Vita, P., Hortobagyi, T.** (2000). Age causes a redistribution of joint torques and  
762 power during gait. *J. Appl. Physiol.* **88**, 1804-1811.  
763  
764 **Dingwell, J.B., Cavanagh, P.R.** (2001). Increased variability of continuous over-  
765 ground walking in neuropathic patients is only indirectly related to sensory loss. *Gait*  
766 *Post.* **14**, 1–10.  
767  
768 **Dingwell, J.B., Marin, L.C.** (2006). Kinematic variability and local dynamic stability  
769 of upper body motions when walking at different speeds. *J. Biomech.* **39**, 444-452.  
770  
771 **Donelan, J.M., Kram, R., Kuo, A.D.** (2002). Simultaneous positive and negative  
772 external mechanical work in human walking. *J. Biomech.* **35**, 117-124.  
773  
774 **Donelan, J.M., Kram, R., Kuo, A.D.** (2001). Mechanical and  
775 metabolic determinants of the preferred step width in human walking. *Proc. Roy. Soc.*  
776 *Lond. B.* **268**, 1985-1992.  
777

778 **England, S.A., Granata, K.P.** (2007). The influence of gait speed on local dynamic  
779 stability of walking. *Gait Post.* **25**, 172-178.  
780  
781 **Estevez, I., Newberry, R.C., Arias de Reyna, L.** (1997) Broiler chickens: A tolerant  
782 social system? *Etologia* **5**, 19-29.  
783  
784 **Farley, C.T., Ko, T.C.** (1997) Mechanics of locomotion in lizards. *J. Exp. Biol.* **200**,  
785 2177-2188.  
786  
787 **Fregly, A.R., Oberman, A., Graybiel, A., Mitchell, R.E.** (1968) Thousand aviator  
788 study: nonvestibular contributions to postural equilibrium functions. *Aero. Med.* **39**,  
789 33-37.  
790  
791 **Gatesy, S.M.** (1999). Guineafowl hind limb function I: cineradiographic analysis and  
792 speed effects. *J. Morphol.* **240**, 127-142.  
793  
794 **Gatesy, S.M., Biewener, A.A.** (1991). Bipedal locomotion: effects of speed, size and  
795 limb posture in birds and humans. *J. Zool.* **224**, 127-147.  
796  
797 **Granata, K.P., Gottipati, P.** (2008). Fatigue influences the dynamic stability of the  
798 torso. *Ergonomics* **51**, 1258-1271.  
799  
800 **Griffin, T.M., Kram, R.** (2000). Penguin waddling is not wasteful. *Nature* **408**, 929.  
801  
802 **Griffin, T.M., Main, R.P., Farley, C.T.** (2004). Biomechanics of quadrupedal  
803 walking: how do four-legged animals achieve inverted pendulum-like movements? *J.*  
804 *Exp. Biol.* **207**, 3545 -3558.  
805  
806 **Griffin, T.M., Roberts, T.J., Kram, R.** (2003). Metabolic cost of generating  
807 muscular force in human walking: insights from load-carrying and speed experiments.  
808 *J. Appl. Physiol.* **95**,172-183.  
809  
810 **Hartman, F.A.** (1961). *Locomotor mechanisms of birds*. Smithsonian. Misc. Collns.  
811 **143**, 1-91.



812

813 **Havenstein, G.B., Ferket, P.R., Qureshi, M.A.** (2003a). Growth, livability and feed  
814 conversion of 1957 versus 2001 broilers when fed representative 1957 and 2001  
815 broiler diets. *Poult. Sci.* **82**, 1500-1508.

816

817 **Havenstein, G.B., Ferket, P.R., Qureshi, M.A.** (2003b). Carcass composition and  
818 yield of 1957 versus 2001 broilers when fed representative 1957 and 2001 broiler  
819 diets. *Poult. Sci.* **82**, 1509-1518.

820

821 **Havenstein, G.B., Ferket, P.R., Scheideler, S.E., Larson, B.T.** (1994a). Growth,  
822 livability, and feed conversion of 1957 vs. 1991 broilers when fed “typical” 1957 and  
823 1991 broiler diets. *Poult. Sci.* **73**, 1785–1794.

824

825 **Havenstein, G.B., Ferket, P.R., Scheideler, S.E., Rives, D.V.** (1994b). Carcass  
826 composition and yield of 1991 vs. 1957 broilers when fed “typical” 1957 and 1991  
827 broiler diets. *Poult. Sci.* **73**, 1795–1804.

828

829 **Heglund, N.C., Fedak, M.A., Taylor, C.R., Cavagna, G.A.** (1982). Energetics and  
830 mechanics of terrestrial locomotion. IV. Total mechanical energy changes as a  
831 function of speed and body size in birds and mammals. *J. Exp. Biol.* **97**, 57-66.

832

833 **Holt, K.G., Jeng, S.F., Ratcliffe, R., Hamill, J.** (1995). Energetic cost and stability  
834 during human walking at the preferred stride frequency. *J. Motor. Behav.* **27**, 164-  
835 178.

836

837 **Hoyt, D.F., Wickler, S.J., Cogger, E.A.** (2000). Time of contact and step length: the  
838 effect of limb length, running speed, load carrying and incline. *J. Exp. Biol.* **203**, 221-  
839 227.

840

841 **Hutchinson, J.R.** (2004). Biomechanical modelling and sensitivity analysis of  
842 bipedal running ability. I. Extant taxa. *J. Morphol.* **262**, 421-440.

843

844 **Jacobsen, R.D., Hollyday, M.** (1982). A behavioural and electromyographic study of  
845 walking in the chick. *J. Neurophys.* **48**, 238-256.

846

847 **Johnston, R.M., Bekoff, A.** (1992). Constrained and flexible features of rhythmical  
848 hindlimb movements in chicks: kinematic profiles of walking, swimming and  
849 airstepping. *J. Exp. Biol.* **171**, 43-66.

850

851 **Kang, H.G., Dingwell, J.B.** (2008). Effects of walking speed, strength and range of  
852 motion on gait stability in healthy older adults. *J. Biomech.* **41**, 2899-2905.

853

854 **Kerrigan, D.C., Lee, L.W., Collins, J.J., Riley, P.O., Lipsitz, L.A.** (2001).  
855 Reduced hip extension during walking: healthy elderly and fallers versus young  
856 adults. *Arch. Physic. Med. Rehab.* **82**, 26-30.

857

858 **Kestin, S.C., Knowles, T.G., Tinch, A.E., Gregory, N.G.** (1992). Prevalence of leg  
859 weakness in broiler chickens and its relationship with genotype. *Vet. Rec.* **131**, 190-  
860 194.

861

862 **Kestin, S.C., Su, G., Sorensen, P.** (1999). Different commercial broiler crosses have  
863 different susceptibilities to leg weakness. *Poult. Sci.* **78**, 1085-1090.

864

865 **Kestin, S.C., Gordon, S., Su, G., Sorenson, P.** (2001). Relationships in broiler  
866 chickens between lameness, liveweight, growth rate and age. *Vet. Rec.* **148**, 195-197.

867

868 **Knowles, T.G., Kestin, S.C., Haslam, S.M., Brown, S.N., Green, L.E.,**  
869 **Butterworth, A., Pope, S.J., Pfeiffer, D., Nicol, C.J.** (2008). Leg disorders in broiler  
870 chickens: Prevalence, risk factors and prevention. *PLoS ONE* **3**, e1545.

871

872 **Kram, R., Taylor, C.R.** (1990). Energetics of running: A new perspective. *Nature*  
873 **346**, 265-266.

874

875 **Kram, R., Domingo, A., Ferris, D.** (1997). Effect of reduced gravity on the preferred  
876 walk–run transition speed. *J. Exp. Biol.* **200**, 821–826.

877

878 **Kuo, A.** (1999). Stabilization of lateral motion in passive dynamic walking. *Int. J.*  
879 *Robot Res.* **18**, 917-930.

880

881 **Kurz, M.J., Scott-Pandorf, M., Arellano, C., Olsen, D., Whitaker, G.** (2008). The  
882 penguin waddling gait pattern has a more consistent step width than step length. *J.*  
883 *Theor. Biol.* **252**, 272-276.

884

885 **Langman, V.A., Roberts, T.J., Black, J., Maloiy, G.M.O., Heglund, N.C.,**  
886 **Weber, J.M., Kram, R., Taylor, C.R.** (1995). Moving cheaply: energetics of  
887 walking in the African Elephant. *J. Exp. Biol.* **198**,629-632.

888

889 **Letterier, C., Nys, Y.** (1992). Composition, cortical structure and mechanical  
890 properties of chicken tibiotarsi: Effects of growth rate. *Br. Poult. Sci.* **33**, 925-939.

891

892 **Lilburn, M.S.** (1994). Skeletal growth of commercial poultry species. *Poult. Sci.* **73**,  
893 897-903.

894

895 **Marsh, R.L., Ellerby, D.J., Carr, J.A., Henry, H.T., Buchanan, C.I.** (2004).  
896 Partitioning the energetics of walking and running: swinging the limbs is expensive.  
897 *Science* **303**, 80-83.

898

899 **McGeown, D., Danbury, T.C., Waterman-Pearson, A.E., Kestin, S.C.** (1999).  
900 Effects of carprofen on lameness in broiler chickens. *Vet. Rec.* **144**, 668-671.

901

902 **McMahon, T.A.** (1985). The role of compliance in mammalian running gaits. *J. Exp.*  
903 *Biol.* **115**, 263-282.

904

905 **McMahon, T.A., Valiant, G., Frederick, E.C.** (1987). Groucho running. *J. Appl.*  
906 *Physiol.* **62**, 2326-2337.

907

908 **Mench, J.A.** (2004). Lameness. In: *Measuring and Auditing Broiler Welfare*. CABI,  
909 Wallingford, UK.

910

911 **Messier, S.P.** (1994). Osteoarthritis of the knee and associated factors of age and  
912 obesity effects on gait. *Med. Sci. Sport Ex.* **26**, 1446-1452.

913

914 **Messier, S.P., Ettinger, W.H., Doyle, T.E.** (1996). Obesity: Effects on Gait in an  
915 Osteoarthritic Population. *J. Appl. Biomech.* **12**, 161-172.  
916  
917 **Muir, G.D., Gosline, J.M., Steeves, J.D.** (1996). Ontogeny of bipedal locomotion:  
918 walking and running in the chick. *J. Physiol.* **493**, 589-601.  
919  
920 **Naas, I.A., Paz, I.C.L.A., Baracho, M.S., Menezes, A.G., Bueno, L.G.F., Almeida,**  
921 **I.C.L., Moura, D.J.** (2009). Impact of lameness on broiler well-being. *J. Appl. Poult.*  
922 *Res.* **18**, 432-439.  
923  
924 **Nicholson, D.** (1998). Research, is it the broiler industry's partner into the new  
925 millennium? *W. Poult. Sci. J.* **54**, 271-278.  
926  
927 **Nudds, R.L., Folkow, L.P., Lees, J.J., Tickle, P.G., Stokkan, K.A., Codd, J.R.**  
928 (2010). Evidence for energy savings from aerial running in the Svalbard rock  
929 ptarmigan (*Lagopus muta hyperborea*). *Proc. Roy. Soc. B.*  
930 doi:10.1098/rspb.2010.2742.  
931  
932 **Pattison, M.** (1992). Impacts of bone problems on the poultry meat industry. In:  
933 *Bone Biology and Skeletal Disorders in Poultry*, Carfax Publishing Co., Abingdon.  
934  
935 **Paxton, H., Anthony, N.B., Corr, S.A., Hutchinson, J.R.** (2010). The effects of  
936 selective breeding on the architectural properties of the pelvic limb in broiler  
937 chickens: a comparative study across modern and ancestral populations. *J. Anat.* **217**,  
938 153-166.  
939  
940 **Pinshow, B., Fedak, M.A., Schmidt-Nielsen, K.** (1977). Terrestrial locomotion in  
941 penguins: it costs more to waddle. *Science* **195**, 592-594.  
942  
943 **Pontzer, H.** (2007). Predicting the cost of locomotion in terrestrial animals: a test of  
944 the LiMb model in humans and quadrupeds. *J. Exp. Biol.* **210**, 484-494.  
945  
946 **Pontzer, H.** (2005). A new model predicting locomotor cost from limb length via  
947 force production. *J. Exp. Biol.* **208**, 1513-1524.

948

949 **Powers, C.M., Heino, J.G., Rao, S., Perry, J.** (1999). The influence of  
950 patellofemoral pain on lower limb loading during gait. *Clin. Biomech.* **14**, 722–72.

951

952 **Reilly, S.M.** (2000). Locomotion in the quail (*coturnix japonica*): the kinematics of  
953 walking and increasing speed. *J. Morph.* **243**, 173-185.

954

955 **Reiter, K., Bessei, W.** (1997). Gait analysis in laying hens and broilers with and  
956 without leg disorders. *Equine Vet. J.* **23**, 110-112.

957

958 **Ren, L., Hutchinson, J.R.** (2008). The three-dimensional locomotor dynamics of  
959 African (*Loxodonta africana*) and Asian (*Elephas maximus*) elephants reveal a  
960 smooth gait transition at moderate speed. *J. Roy. Soc. Interface* **5**, 195-211.

961

962 **Rubenson, J., Heliams, D.B., Lloyd, D.G., Fournier, P.A.** (2004). Gait selection in  
963 the ostrich: mechanical and metabolic characteristics of walking and running with and  
964 without an aerial phase. *Proc. R. Soc. Lond. B* **271**, 1091-1099.

965

966 **Sandilands, V., Brocklehurst, S., Sparks, N., Baker, L., McGovern, R., Thorp, B.,  
967 Pearson, D.** (2011). Assessing leg health in chickens using a force plate and gait  
968 scoring: how many birds is enough? *Vet. Rec.* **168**, 77.

969

970 **Schmidt, C.J., Persia, M.E., Feierstein, E., Kingham, B., Saylor, W.W.** (2009).  
971 Comparison of a modern broiler line and a heritage line unselected since the 1950s.  
972 *Poult. Sci.* **88**, 2610-2619.

973

974 **Scott, T.A.** (2002). Evaluation of lighting programs, diet density, and short-term use  
975 of mash as compared to crumbled starter to reduce incidence of sudden death  
976 syndrome in broiler chicks to 35 days of age. *Can. J. Anim. Sci.* **82**, 375-383.

977

978 **Shipman, D., Donelan, J.M., Kram, R., Kuo, A.D.** (2002). Metabolic cost of  
979 lateral leg swing in human walking. In: *World Congress of Biomechanics*, Canada.

980

- 981 **Sorenson, P., Su, G., Kestin, S.C.** (1999). The effect of photoperiod: scotoperiod on  
982 leg weakness in broiler chickens. *Poult. Sci.* **78**, 336-342.
- 983
- 984 **Spyropoulos, P., Pisciotta, J.C., Pavlou, K.N., Cairns, M.A., Simon, S.R.** (1991).  
985 Biomechanical gait analysis in obese men. *Arch. Physic. Med. Rehab.* **72**, 1065–1070.
- 986
- 987 **Su, G., Sorenson, P., Kestin, S.C.** (1999). Meal feeding is more effective than early  
988 feed restriction at reducing the prevalence of leg weakness in broiler chickens. *Poult.*  
989 *Sci.* **78**, 949-955.
- 990
- 991 **Taylor, C.R.** (1985). Force development during sustained locomotion: A  
992 determinant of gait, speed and metabolic power. *J. Exp. Biol.* **115**, 253-262.
- 993
- 994 **Tickle, P., Nudds, R., Codd, J.** (2009). Uncinate Process Length in Birds Scales  
995 with Resting Metabolic Rate. *PLoS ONE* **4**, e5667.
- 996
- 997 **Tickle, P.G., Ennos, A.R., Lennox, L.E., Perry, S.F., Codd, J.R.** (2007).  
998 Functional significance of the uncinate processes in birds. *J. Exp. Biol.* **210**, 3955-  
999 3961.
- 1000
- 1001 **Tobalske, B.W., Dial, K.P.** (2000). Effects of body size on take-off flight  
1002 performance in the Phasianidae (Aves). *J. Exp. Biol.* **203**, 3319-3332.
- 1003
- 1004 **Usherwood, J.R., Szymanek, K.L., Daley, M.A.** (2008). Compass gait mechanics  
1005 account for top walking speeds in ducks and humans. *J. Exp. Biol.* **211**, 3744-3749.
- 1006
- 1007 **Vestergaard, K.S., Sanotra, G.S.** (1999). Relationships between leg disorders and  
1008 changes in the behaviour of broiler chickens. *Vet. Rec.* **144**, 205-209.
- 1009
- 1010 **Waldenstedt, L.** (2006). Nutritional factors of importance for optimal leg health in  
1011 broilers: A review. *Anim. Feed. Sci. Tech.* **126**, 291-307.
- 1012
- 1013 **Webster, J.** (1995). *Animal Welfare: A Cool Eye Towards Eden.* Cambridge, MA,  
1014 Blackwell Science.

1015

1016 **Weeks, C.A., Danbury, T.D., Davies, H.C., Hunt, P., Kestin, S.C.** (2000). The  
1017 behaviour of broiler chickens and its modification for lameness. *Appl. Anim. Behav.*  
1018 *Sci.* **67**, 111-125.

1019

1020 **Weeks, C.A., Nicol, C.J., Sherwin, C.M., Kestin, S.C.** (1994). Comparison of the  
1021 behaviour of broiler chickens in indoor and free-range environments. *Anim. Welfare*  
1022 **3**, 179-192.

1023

1024 **Whitehead, C.C., Fleming, R.H., Julian, R.J., Sørensen, P.** (2003). Skeletal  
1025 problems associated with selection for increased production. In: *Poultry Genetics,*  
1026 *Breeding and Biotechnology*, CABI Publishing, Wallingford, UK

1027

1028 **Wiley, J.S., Biknevicius, A.R., Reilly, S.M., Earls, K.D.** (2004) The tale of the tail:  
1029 limb function and locomotor mechanics in *Alligator mississippiensis*. *J. Exp.*  
1030 *Biol.* **207**,553-563.

1031

1032 **Winter, D.A.** (1989). Biomechanics of normal and pathological gait: implications  
1033 for understanding human locomotor control. *J. Mot. Behav.* **21**, 337-55.

1034

1035 **Winter, D.A., Sidwall, H.G., Hobson, D.A.** (1974). Measurement and reduction of  
1036 noise in kinematics of locomotion. *J. Biomech.* **7**, 157-159.

1037

1038 **Wojtys, E.M., Wylie, B.B., Huston, L.J.** (1996). The effects of muscle fatigue on  
1039 neuromuscular function and anterior tibial translation in healthy knees. *Am. J. Sport*  
1040 *Med.* **24**, 615-621.

1041

1042 **Yang, N., Jiang, R.S.** (2005). Recent advances in breeding for quality chickens. *W.*  
1043 *Poult. Sci. J.* **61**, 373-381.

1044

1045 **Yoshino, K., Motoshige, T., Araki, T., Matsuoka, K.** (2004). Effect of prolonged  
1046 free-walking fatigue on gait and physiological rhythm. *J. Biomech.* **37**, 1271-1280.

1047

1048 **Zani, P.A., Gottschall, J.S., Kram, R.** (2005). Giant Galapagos tortoises walk  
1049 without inverted pendulum mechanical energy exchange. *J. Exp. Biol.* **208**, 1489-  
1050 1494.

1051

1052

1053

1054

1055

1056

1057

1058

1059

1060

1061

1062

1063

1064

1065

1066

1067

1068

1069

1070

1071

1072

1073

1074

1075

1076

1077

1078

1079

1080

1081



1082 **Table 1 – Mean subject data for chicken breeds used in this study**

1083 Data represented are mean  $\pm$  s.d. Means in a column (mass and CoM height only)  
1084 with no common superscript differ significantly at the 0.05 level between bird groups,  
1085 emphasised in bold.

1086

1087 **Table 2 –General morphological characteristics for the chicken breeds used in this**  
1088 **study**

1089 Data originates from birds used in a previous muscle architecture study (Paxton et al.,  
1090 2010), as well as from data collected on farms to provide a general overview of how  
1091 morphology differs between the bird groups. The data therefore do not necessarily  
1092 correspond directly to the subjects used in this study, but were all selected using the  
1093 same criteria as set out here. To make valid comparisons across bird populations, the  
1094 data (body measurements only) were normalised to negate the effect of body mass  
1095 (lengths  $\propto$  body mass<sup>1/3</sup>). Values reported here are mean  $\pm$  s.d. (sample size = 10,  
1096 unless otherwise stated within the table). Means in a column with no common  
1097 superscript differ significantly at the 0.05 level and are highlighted in bold.

1098

1099 **Table 3 – Trackway width, lateral velocity and foot displacement (lateral and**  
1100 **vertical) at preferred walking speed in chickens**

1101 Data represented are mean  $\pm$  s.d. Means in a column with no common superscript differ  
1102 significantly at the 0.05 level. The coefficient of variation for lateral velocity is shown in  
1103 brackets.

1104

1105 **Table 4 – Dynamic gait variables for the study chickens at their preferred**  
1106 **walking speed**

1107 Data represented are mean  $\pm$  standard deviation. \* represents significant differences  
1108 at the 0.05 level between bird groups. Only significant asymmetries are reported; (<sup>a</sup>)  
1109 refers to significant differences from pureline A birds.

1110

1111

1112

1113

1114 **Figure 1 – Duty factor against CoM velocity for individual steps from walking**  
1115 **chickens**

1116 Each symbol represents an individual bird, with the same symbol indicating multiple  
1117 steps per bird used for this analysis. The regression lines represent a strong  
1118 relationship ( $r^2 > 0.4$ ) between duty factor and CoM velocity for pureline A and the  
1119 broiler population, with a more moderate relationship ( $r^2$  between 0.2 and 0.4) for  
1120 pureline B chickens. The slopes of all three lines are statistically different from 0 ( $p <$   
1121 0.001).

1122

1123 **Figure 2 – Step variable changes with speed in walking chickens**

1124 Data represented are mean  $\pm$  s.d. The different coloured data points refer to pureline  
1125 A (red), pureline B (blue) and the broiler population (black) respectively. Relative  
1126 values were calculated by dividing step length and step width by mean hip height.  
1127 Relative step frequency was calculated using the following equation,  $f (h g^{-1})^{0.5}$ , where  
1128  $g = 9.81\text{ms}^{-2}$  and  $h =$  mean hip height (Alexander, 1977; Alexander and Jayes, 1983).  
1129 The slope (m) values were tested for significant differences between bird populations,  
1130 -- i.e. the coefficient for the interaction between the dependent variable and the bird  
1131 group = 0. Mean slope values are displayed if no significant differences exist.

1132

1133 **Figure 3 – Stance and swing phase durations in walking chickens**

1134 The stance ( $\square$ ) and swing phase ( $\circ$ ) durations for all commercial line chickens across  
1135 their speed range. The different coloured data points refer to pureline A (red),  
1136 pureline B (blue) and the broiler population (black) respectively. Individuals are not  
1137 distinguished; thus data points may represent multiple steps from one bird.

1138

1139 **Figure 4 – Leg length and angle at preferred walking speed in chickens**

1140 Data represented are means  $\pm$  s.d. (shaded areas). Stance (solid line) and swing  
1141 (dashed line) phase are both shown for the right (red) and left foot (blue).

1142

1143 **Figure 5 – The ground reaction forces and CoM displacements at the preferred**  
1144 **walking speed of three chicken populations.**

1145 Data represented are means  $\pm$  s.d. (shaded areas). Vertical forces (black), fore-aft  
1146 forces (yellow) and mediolateral forces (red- right foot and blue-left foot) are shown.

1147

1148 **Figure 6 - The mechanical cost of transport of domestic chickens at their**  
1149 **preferred walking speed**

1150 Data represented for the commercial line birds are means  $\pm$  s.d. All other data are  
1151 means only. Note that data for the three chicken populations are shown together in  
1152 purple at the bottom left for comparison to the guineafowl and ostrich data, and  
1153 separately in the inset at the top right to illustrate differences among them.

| <b>Bird Group</b> | <b>No. of Individuals</b> | <b>No. of steps (n)</b> | <b>Mass (kg)</b>             | <b>CoM Height (cm)</b>          | <b>Mean Velocity (ms<sup>-1</sup>)</b> | <b>Velocity Range (ms<sup>-1</sup>)</b> |
|-------------------|---------------------------|-------------------------|------------------------------|---------------------------------|----------------------------------------|-----------------------------------------|
| <b>Pureline A</b> | 8                         | 118                     | 2.8 ± 0.3 <sup>1</sup>       | <b>0.21 ± 0.008<sup>2</sup></b> | 0.25 ± 0.07                            | 0.10 - 0.43                             |
| <b>Pureline B</b> | 8                         | 90                      | 2.7 ± 0.4 <sup>1</sup>       | <b>0.20 ± 0.008<sup>1</sup></b> | 0.26 ± 0.08                            | 0.10 - 0.45                             |
| <b>Broiler</b>    | 9                         | 130                     | <b>3.5 ± 0.3<sup>2</sup></b> | <b>0.22 ± 0.007<sup>3</sup></b> | 0.34 ± 0.17                            | 0.11 - 1.10                             |

| <b>Bird Group</b>                     | <b>Girth<br/>(x 10<sup>-2</sup>)</b> | <b>Hip Width<br/>(x 10<sup>-2</sup>)</b> | <b>Keel length<br/>(x 10<sup>-2</sup>)</b> | <b>Total Leg<br/>Length (x 10<sup>-2</sup>)</b> | <b>Breast Muscle Mass<br/>(% body mass)</b> |
|---------------------------------------|--------------------------------------|------------------------------------------|--------------------------------------------|-------------------------------------------------|---------------------------------------------|
| <b>Pureline A</b>                     | 25.3 ± 0.6 <sup>1</sup>              | 6.34 ± 0.16 <sup>1</sup>                 | 9.38 ± 0.45 <sup>1</sup>                   | 17.8 ± 0.59 <sup>1</sup>                        | <b>22.1 ± 1.6<sup>3</sup></b> (n = 128)     |
| <b>Pureline B</b>                     | 24.4 ± 1.2 <sup>1</sup>              | <b>6.90 ± 0.28<sup>2</sup></b>           | 8.92 ± 0.79 <sup>1</sup>                   | 18.4 ± 0.97 <sup>1</sup>                        | <b>20.1 ± 1.4<sup>1</sup></b> (n = 202)     |
| <b>Broiler</b>                        | 24.7 ± 1.3 <sup>1</sup>              | 6.60 ± 0.17 <sup>1</sup>                 | 8.27 ± 1.21 <sup>1</sup>                   | 18.6 ± 0.58 <sup>1</sup>                        | <b>20.6 ± 1.0<sup>2</sup></b> (n = 18)      |
| <b>K-S test<br/>significance</b>      | 0.852                                | 0.493                                    | 0.000                                      | 0.489                                           | 0.000.                                      |
| <b>Levene's test<br/>significance</b> | 0.141                                | 0.106                                    | 0.003                                      | 0.715                                           | 0.000                                       |

| Bird Group        | Trackway width | Lateral velocity (ms <sup>-1</sup> )    |                                         | Lateral displacement (m)         |                                  | Vertical displacement (m)        |
|-------------------|----------------|-----------------------------------------|-----------------------------------------|----------------------------------|----------------------------------|----------------------------------|
|                   |                | Right                                   | Left                                    | Right                            | Left                             |                                  |
| <b>Pureline A</b> | 0.52 ± 0.16    | <b>0.13 ± 0.05<sup>2</sup></b><br>(55%) | <b>0.09 ± 0.05<sup>2</sup></b><br>(56%) | 0.037 ± 0.023 <sup>1</sup>       | 0.026 ± 0.023 <sup>1</sup>       | <b>0.082 ± 0.032<sup>2</sup></b> |
| <b>Pureline B</b> | 0.53 ± 0.17    | 0.12 ± 0.05 <sup>1</sup><br>(42%)       | 0.12 ± 0.05 <sup>1</sup><br>(42%)       | <b>0.055 ± 0.024<sup>2</sup></b> | <b>0.039 ± 0.033<sup>2</sup></b> | <b>0.056 ± 0.018<sup>1</sup></b> |
| <b>Broiler</b>    | 0.48 ± 0.10    | 0.12 ± 0.03 <sup>1</sup><br>(33%)       | 0.14 ± 0.04 <sup>1</sup><br>(29%)       | 0.039 ± 0.020 <sup>1</sup>       | 0.020 ± 0.029 <sup>1</sup>       | <b>0.091 ± 0.024<sup>3</sup></b> |

|                                      | Bird Population     |                     |                          |
|--------------------------------------|---------------------|---------------------|--------------------------|
|                                      | Pureline A          | Pureline B          | Broiler                  |
| <b>Step variables:</b>               |                     |                     |                          |
| Number of steps (n)                  | 46                  | 39                  | 56                       |
| Relative step length                 | 0.54 ± 0.09         | <b>0.58 ± 0.09*</b> | 0.53 ± 0.01              |
| Relative step width                  | 0.20 ± 0.09         | 0.25 ± 0.09         | 0.24 ± 0.07              |
| Relative step frequency              | 0.30 ± 0.04         | <b>0.28 ± 0.03*</b> | 0.31 ± 0.04              |
| Sweep angle (°)                      | 36.8 ± 7.4          | <b>40.0 ± 8.0*</b>  | 34.8 ± 5.3               |
| <b>Peak forces (BW) :</b>            |                     |                     |                          |
| Vertical forces                      | 1.18 ± 0.12         | 1.27 ± 0.30         | 1.38 ± 0.10 <sup>a</sup> |
| For-aft forces                       | 0.10 ± 0.04         | 0.11 ± 0.04         | 0.12 ± 0.03              |
| Mediolateral forces<br>(Right foot)  | 0.12 ± 0.09         | 0.18 ± 0.06         | <b>0.24 ± 0.04*</b>      |
| Mediolateral forces<br>(Left foot)   | 0.11 ± 0.06         | 0.09 ± 0.04         | <b>0.11 ± 0.04*</b>      |
| <b>CoM Energies:</b>                 |                     |                     |                          |
| Δ Gravitational Potential Energy (J) | 0.06 ± 0.16         | 0.04 ± 0.45         | 0.01 ± 0.29              |
| Δ Kinetic energy (J)                 | -0.02 ± 0.14        | -0.04 ± 0.16        | 0.05 ± 0.09              |
| Δ Total energy (J)                   | 0.04 ± 0.14         | -0.02 ± 0.43        | 0.05 ± 0.23              |
| <b>Work Done (absolute values):</b>  |                     |                     |                          |
| Vertical direction (J)               | <b>0.60 ± 0.20*</b> | 0.83 ± 0.64         | 0.94 ± 0.30              |
| For-aft direction (J)                | 0.20 ± 0.08         | 0.21 ± 0.05         | 0.22 ± 0.06              |
| Mediolateral direction (J)           | 0.19 ± 0.14         | 0.20 ± 0.11         | <b>0.26 ± 0.11*</b>      |

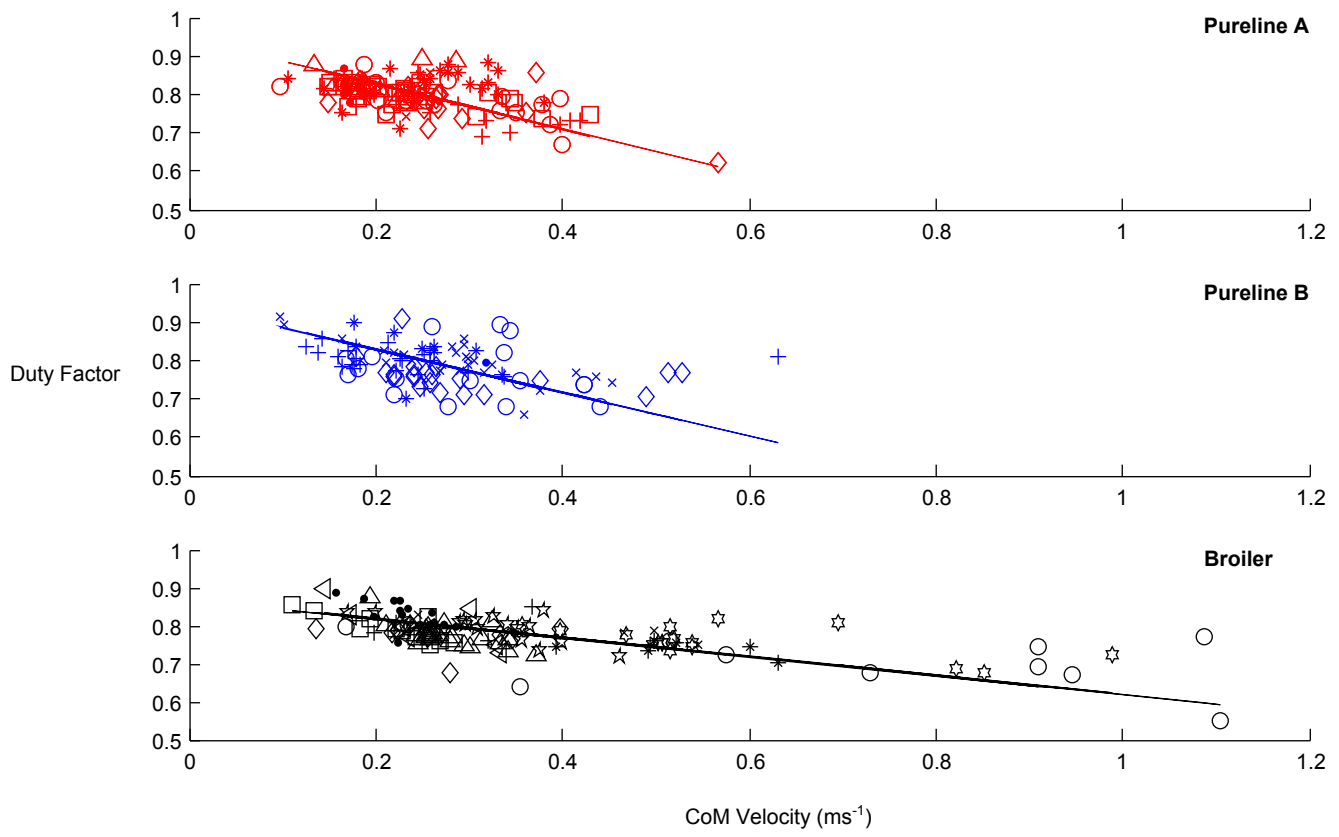



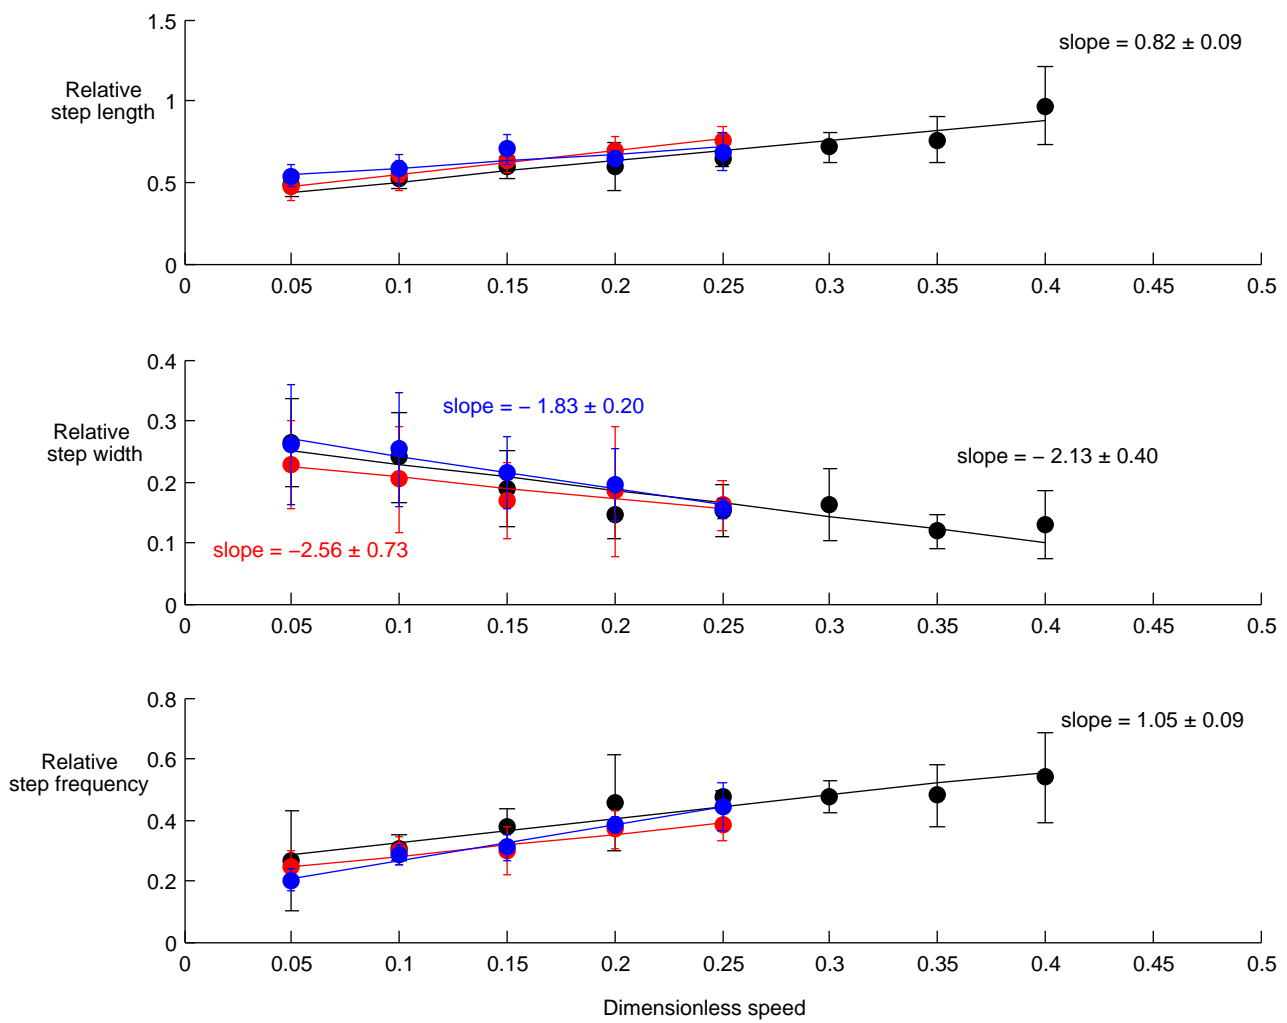

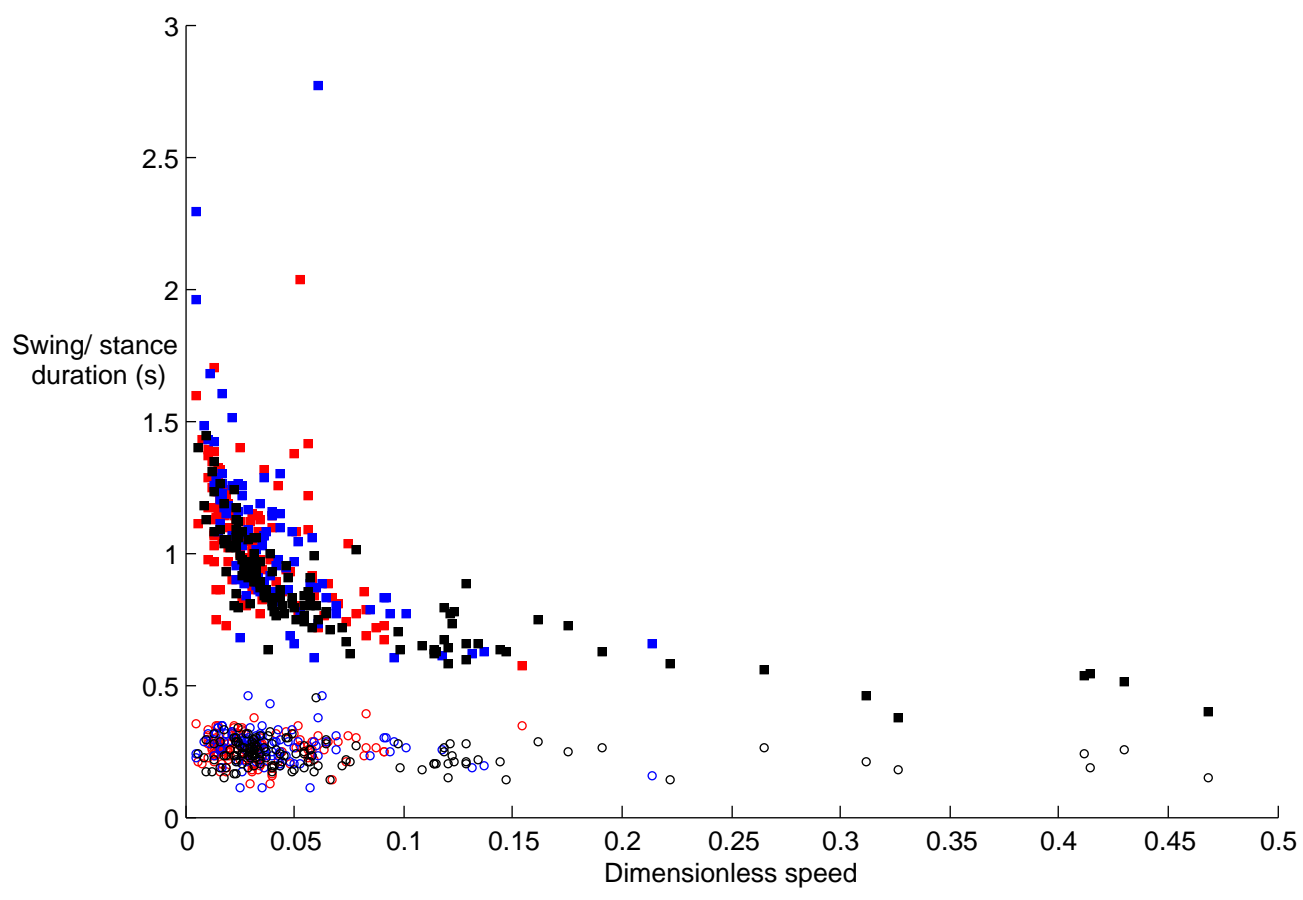

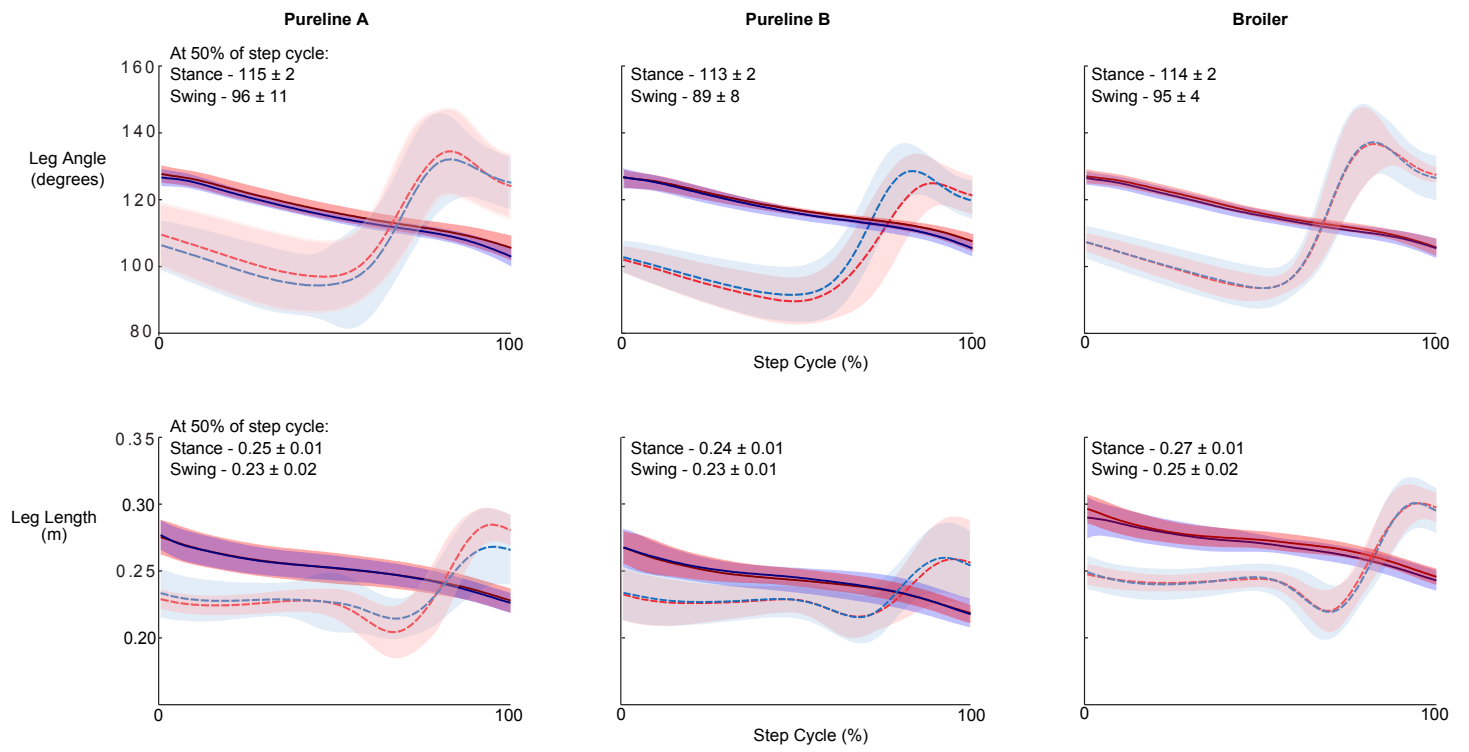

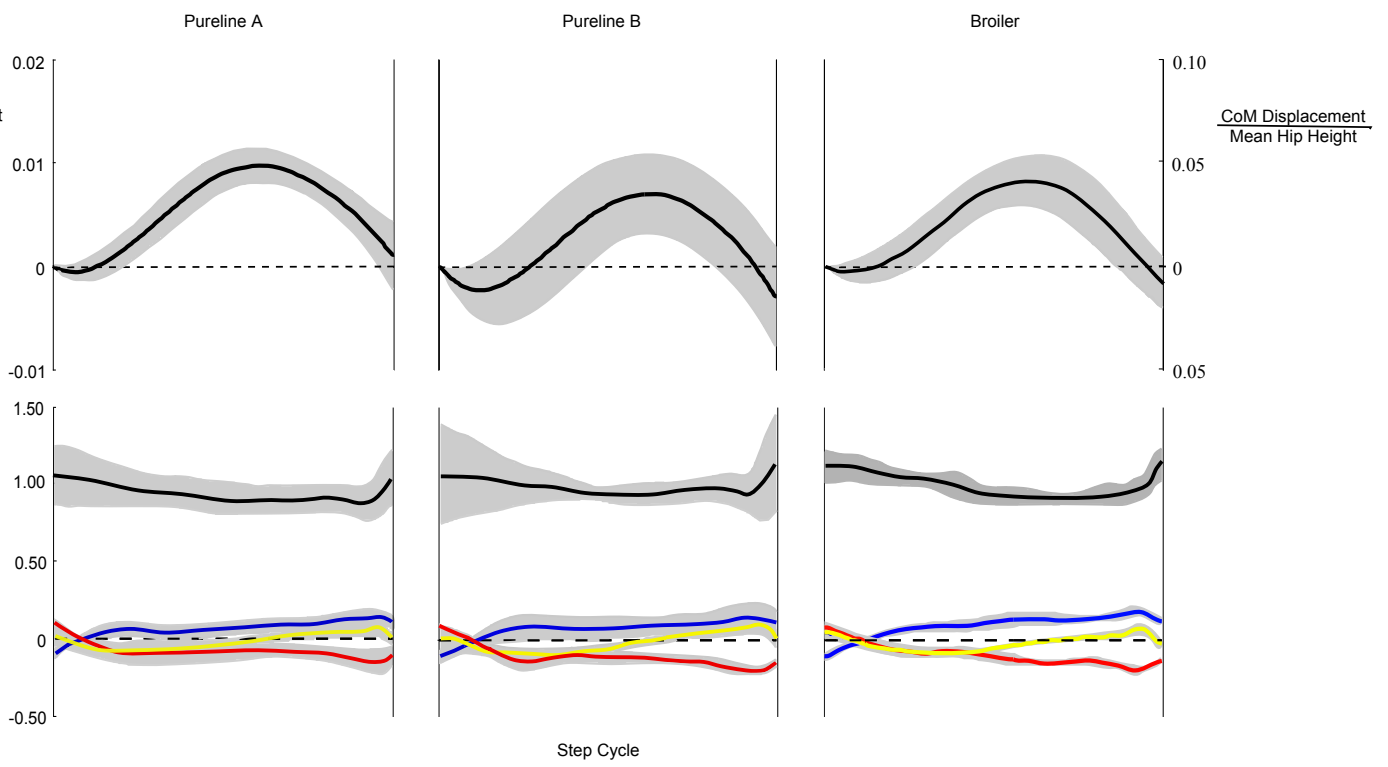

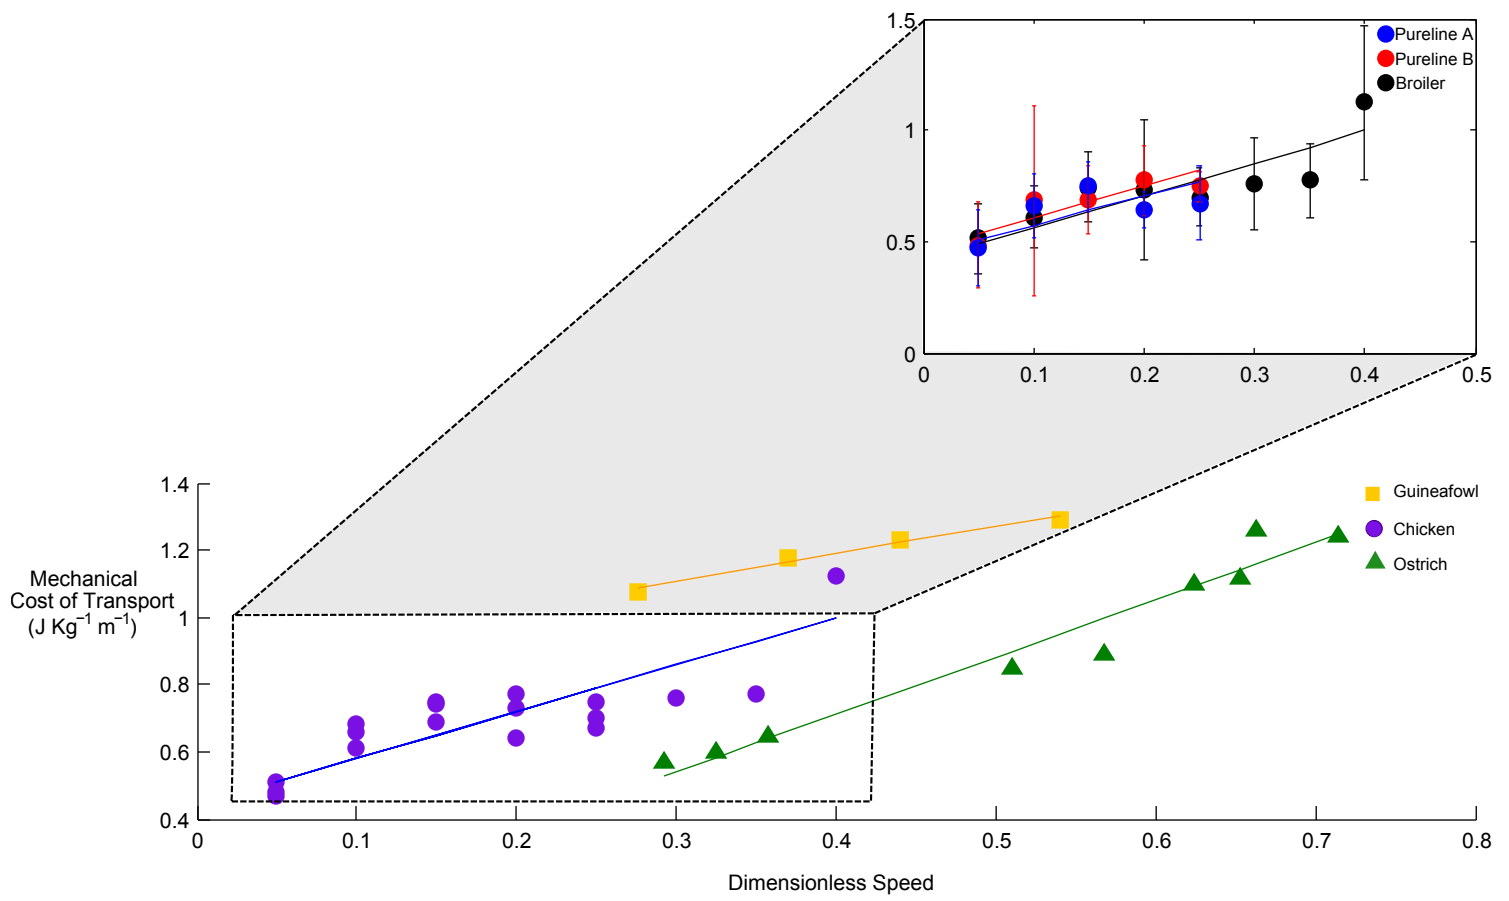

Source: https://cob.silverchair.com/jeb/article-pdf/doi/10.1242/jeb.080309/2036716/jeb_080309.pdf
